# Supplementary material for: Prospective observational study on the pharmacokinetic properties of the Irrua ribavirin regimen used in routine clinical practice in patients with Lassa fever in Nigeria
Source: PubMed Central journal article supplement — BMJ Open. 2020 Apr 16;10(4):e036936. doi: 10.1136/bmjopen-2020-036936 (PMC7200043; doi:10.1136/bmjopen-2020-036936), 2020-04-16
Supplement: bmjopen-2020-036936.draft_revisions.pdf [file bmjopen-2020-036936.draft_revisions.pdf]

# BMJ Open

BMJ Open is committed to open peer review. As part of this commitment we make the peer review history of every article we publish publicly available.

When an article is published we post the peer reviewers' comments and the authors' responses online. We also post the versions of the paper that were used during peer review. These are the versions that the peer review comments apply to.

The versions of the paper that follow are the versions that were submitted during the peer review process. They are not the versions of record or the final published versions. They should not be cited or distributed as the published version of this manuscript.

BMJ Open is an open access journal and the full, final, typeset and author-corrected version of record of the manuscript is available on our site with no access controls, subscription charges or pay-per-view fees (<http://bmjopen.bmj.com>).

If you have any questions on BMJ Open's open peer review process please email [info.bmjopen@bmj.com](mailto:info.bmjopen@bmj.com)

# BMJ Open

## A study protocol for a prospective observational study on the pharmacokinetic properties of the Irrua ribavirin regimen used in routine clinical practice in Lassa fever patients in Nigeria

|                               |                                                                                                                                                                                                                                                                                                                                                                                                                                                                                                                                                                                                                                                                                                                                                                                                                                                                                                                                                                                                                                                                                                                                                                                                                                                                                                                                                                                                                                                                                                                                                                                                                                                                                                                                                                                                                                                                                                                                                                                                                                                                                                                                                                                                                         |
|-------------------------------|-------------------------------------------------------------------------------------------------------------------------------------------------------------------------------------------------------------------------------------------------------------------------------------------------------------------------------------------------------------------------------------------------------------------------------------------------------------------------------------------------------------------------------------------------------------------------------------------------------------------------------------------------------------------------------------------------------------------------------------------------------------------------------------------------------------------------------------------------------------------------------------------------------------------------------------------------------------------------------------------------------------------------------------------------------------------------------------------------------------------------------------------------------------------------------------------------------------------------------------------------------------------------------------------------------------------------------------------------------------------------------------------------------------------------------------------------------------------------------------------------------------------------------------------------------------------------------------------------------------------------------------------------------------------------------------------------------------------------------------------------------------------------------------------------------------------------------------------------------------------------------------------------------------------------------------------------------------------------------------------------------------------------------------------------------------------------------------------------------------------------------------------------------------------------------------------------------------------------|
| Journal:                      | <i>BMJ Open</i>                                                                                                                                                                                                                                                                                                                                                                                                                                                                                                                                                                                                                                                                                                                                                                                                                                                                                                                                                                                                                                                                                                                                                                                                                                                                                                                                                                                                                                                                                                                                                                                                                                                                                                                                                                                                                                                                                                                                                                                                                                                                                                                                                                                                         |
| Manuscript ID                 | bmjopen-2020-036936                                                                                                                                                                                                                                                                                                                                                                                                                                                                                                                                                                                                                                                                                                                                                                                                                                                                                                                                                                                                                                                                                                                                                                                                                                                                                                                                                                                                                                                                                                                                                                                                                                                                                                                                                                                                                                                                                                                                                                                                                                                                                                                                                                                                     |
| Article Type:                 | Protocol                                                                                                                                                                                                                                                                                                                                                                                                                                                                                                                                                                                                                                                                                                                                                                                                                                                                                                                                                                                                                                                                                                                                                                                                                                                                                                                                                                                                                                                                                                                                                                                                                                                                                                                                                                                                                                                                                                                                                                                                                                                                                                                                                                                                                |
| Date Submitted by the Author: | 14-Jan-2020                                                                                                                                                                                                                                                                                                                                                                                                                                                                                                                                                                                                                                                                                                                                                                                                                                                                                                                                                                                                                                                                                                                                                                                                                                                                                                                                                                                                                                                                                                                                                                                                                                                                                                                                                                                                                                                                                                                                                                                                                                                                                                                                                                                                             |
| Complete List of Authors:     | <p>Erameh, Cyril; Irrua Specialist Teaching Hospital, Institute of Lassa Fever Research and Control; Irrua Specialist Teaching Hospital, Department of Medicine</p> <p>Edeawe, Osahogie ; Irrua Specialist Teaching Hospital, Institute of Lassa Fever Research and Control</p> <p>Akhideno, Peter; Irrua Specialist Teaching Hospital, Institute of Lassa Fever Research and Control; Irrua Specialist Teaching Hospital, Department of Medicine</p> <p>Eifediyi , Gloria; Irrua Specialist Teaching Hospital, Institute of Lassa Fever Research and Control</p> <p>Omansen, Till; Bernhard-Nocht-Institut für Tropenmedizin, Department of Tropical Medicine &amp; I. Department of Medicine University Medical Center Hamburg-Eppendorf</p> <p>Wagner, Christine; Bernhard-Nocht-Institut für Tropenmedizin, Department of Tropical Medicine &amp; I. Department of Medicine University Medical Center Hamburg-Eppendorf</p> <p>Sarpong, Francisca; Bernhard-Nocht-Institut für Tropenmedizin, Department of Tropical Medicine &amp; I. Department of Medicine University Medical Center Hamburg-Eppendorf</p> <p>Koch, Till; Bernhard-Nocht-Institut für Tropenmedizin, Department of Tropical Medicine &amp; I. Department of Medicine University Medical Center Hamburg-Eppendorf</p> <p>Wicha, Sebastian; University of Hamburg, Department of Clinical Pharmacology</p> <p>Kurth, Florian; Bernhard-Nocht-Institut für Tropenmedizin, Department of Tropical Medicine &amp; I. Department of Medicine University Medical Center Hamburg-Eppendorf; Charité Universitätsmedizin Berlin, Department of Infectious Diseases and Pulmonary Medicine</p> <p>Duraffour, Sophie; Bernhard-Nocht-Institut für Tropenmedizin, Department of Virology</p> <p>Oesterreich, Lisa; Bernhard-Nocht-Institut für Tropenmedizin, Department of Virology</p> <p>Pahlmann, Meike; Bernhard-Nocht-Institut für Tropenmedizin, Department of Virology</p> <p>Okogbenin, Sylvanus; Irrua Specialist Teaching Hospital, Department of Obstetrics and Gynaecology; Irrua Specialist Teaching Hospital, Institute of Lassa Fever Research and Control</p> <p>Ogbaini-Emovon, Ephraim; Irrua Specialist Teaching Hospital, Institute</p> |

1  
2  
3  
4  
5  
6  
7  
8  
9  
10  
11  
12  
13  
14  
15  
16  
17  
18  
19  
20  
21  
22  
23  
24  
25  
26  
27  
28  
29  
30  
31  
32  
33  
34  
35  
36  
37  
38  
39  
40  
41  
42  
43  
44  
45  
46  
47  
48  
49  
50  
51  
52  
53  
54  
55  
56  
57  
58  
59  
60

|           |                                                                                                                                                                                                                                                                                                                                                                                                                                                                                           |
|-----------|-------------------------------------------------------------------------------------------------------------------------------------------------------------------------------------------------------------------------------------------------------------------------------------------------------------------------------------------------------------------------------------------------------------------------------------------------------------------------------------------|
|           | of Lassa Fever Research and Control<br>Günther, Stephan; Bernhard-Nocht-Institut für Tropenmedizin,<br>Department of Virology<br>Ramharter, Michael; Bernhard-Nocht-Institut für Tropenmedizin,<br>Department of Tropical Medicine & I. Department of Medicine University<br>Medical Center Hamburg-Eppendorf<br>Groger, Mirjam; Bernhard-Nocht-Institut für Tropenmedizin, Department<br>of Tropical Medicine & I. Department of Medicine University Medical<br>Center Hamburg-Eppendorf |
| Keywords: | INFECTIOUS DISEASES, CLINICAL PHARMACOLOGY, VIROLOGY                                                                                                                                                                                                                                                                                                                                                                                                                                      |
|           |                                                                                                                                                                                                                                                                                                                                                                                                                                                                                           |





I, the Submitting Author has the right to grant and does grant on behalf of all authors of the Work (as defined in the below author licence), an exclusive licence and/or a non-exclusive licence for contributions from authors who are: i) UK Crown employees; ii) where BMJ has agreed a CC-BY licence shall apply, and/or iii) in accordance with the terms applicable for US Federal Government officers or employees acting as part of their official duties; on a worldwide, perpetual, irrevocable, royalty-free basis to BMJ Publishing Group Ltd ("BMJ") its licensees and where the relevant Journal is co-owned by BMJ to the co-owners of the Journal, to publish the Work in this journal and any other BMJ products and to exploit all rights, as set out in our [licence](#).

The Submitting Author accepts and understands that any supply made under these terms is made by BMJ to the Submitting Author unless you are acting as an employee on behalf of your employer or a postgraduate student of an affiliated institution which is paying any applicable article publishing charge ("APC") for Open Access articles. Where the Submitting Author wishes to make the Work available on an Open Access basis (and intends to pay the relevant APC), the terms of reuse of such Open Access shall be governed by a Creative Commons licence – details of these licences and which [Creative Commons](#) licence will apply to this Work are set out in our licence referred to above.

Other than as permitted in any relevant BMJ Author's Self Archiving Policies, I confirm this Work has not been accepted for publication elsewhere, is not being considered for publication elsewhere and does not duplicate material already published. I confirm all authors consent to publication of this Work and authorise the granting of this licence.

1  
2  
3  
4  
5  
6  
7  
8  
9  
10  
11  
12  
13  
14  
15  
16  
17  
18  
19  
20  
21  
22  
23  
24  
25  
26  
27  
28  
29  
30  
31  
32  
33  
34  
35  
36  
37  
38  
39  
40  
41  
42  
43  
44  
45  
46  
47  
48  
49  
50  
51  
52  
53  
54  
55  
56  
57  
58  
59  
60

# A study protocol for a prospective observational study on the pharmacokinetic properties of the Irrua ribavirin regimen used in routine clinical practice in Lassa fever patients in Nigeria

## *Acronym: PAIRR (Pharmacologic Analysis of the Irrua Ribavirin Regimen)*

### Authors:

Cyril Erameh<sup>1,2</sup>, Osahogie Edeawe<sup>1</sup>, Peter Akhiden<sup>1,2</sup>, Gloria Eifediyi<sup>1</sup>, Till Omansen<sup>3</sup>, Christine Wagner<sup>3</sup>, Francisca Sarpong<sup>3</sup>, Till Koch<sup>3</sup>, Sebastian Wicha<sup>4</sup>, Florian Kurth<sup>3,5</sup>, Sophie Duraffour<sup>6</sup>, Lisa Oestereich<sup>6</sup>, Meike Pahlmann<sup>6</sup>, Sylvanus Okogbenin<sup>1,7</sup>, Ephraim Ogbaini-Emovon<sup>1</sup>, Stephan Günther<sup>6</sup>, Michael Ramharter<sup>3</sup>, Mirjam Groger<sup>3</sup>

1 Institute of Lassa Fever Research and Control, Irrua Specialist Teaching Hospital, Irrua, Nigeria

2 Department of Medicine, Irrua Specialist Teaching Hospital, Irrua, Nigeria

3 Department of Tropical Medicine, Bernhard Nocht Institute for Tropical Medicine & I. Department of Medicine University Medical Center Hamburg-Eppendorf, Hamburg, Germany

4 Department of Clinical Pharmacology, Institute of Pharmacology, University of Hamburg, Hamburg, Germany

5 Department of Infectious Diseases and Pulmonary Medicine, Charité Universitätsmedizin Berlin, Berlin, Germany

6 Department of Virology, Bernhard Nocht Institute for Tropical Medicine, Hamburg, Germany

7 Department of Obstetrics and Gynecology, Irrua Specialist Teaching Hospital, Irrua, Nigeria

### **Corresponding Author:**

Mirjam Groger MD, PhD

Department of Tropical Medicine

Bernhard-Nocht-Institute for Tropical Medicine &

I. Dep. of Medicine, University Medical Center Hamburg-Eppendorf

groger@bnitm.de

Version: 03 06DEC2019

## Abstract

### Introduction:

Lassa fever (LF) is a severe and often fatal systemic disease in humans and affects a large number of countries in West Africa. Treatment options are limited to supportive care and the broad-spectrum antiviral agent ribavirin. However, evidence for ribavirin efficacy in LF patients is poor and pharmacokinetic (PK) data are not available.

Irrua Specialist Teaching Hospital (ISTH), developed an intravenous ribavirin regimen different to the WHO recommendation. Apart from a lower total daily dose the drug is usually administered once per day which reduces the exposure of personnel to LF patients. The aim of this study is to characterize the PK of the Irrua Ribavirin Regimen.

### Methods and analysis:

This prospective, observational clinical study will assess PK properties of the Irrua Ribavirin Regimen on routinely ribavirin treated LF patients at ISTH, a referral hospital serving 19 local governmental areas in a LF endemic zone in Nigeria. Participants will be adults with PCR-confirmed LF. The primary objective is to describe classical PK parameters for ribavirin (maximum concentration  $C_{max}$ , maximum time  $T_{max}$ , area under the curve AUC, half-life time  $T_{1/2}$ , volume of distribution). Blood samples will be collected at 0.5, 1, 3, 5, 8, 12 and 24 hours after doses on day 1, day 4 and day 10 of ribavirin treatment. Plasma ribavirin concentrations will be determined using liquid chromatography coupled to tandem mass spectrometry (LC-MS/MS).

### Ethics and dissemination

The study will be conducted in compliance with the protocol, the Declaration of Helsinki, the ICH-GCP guideline and the Nigerian National Code for Health Research Ethics. The protocol has received approval by the Health Research Ethics Committee of ISTH.

Results will be made available to LF survivors, their caregivers, the funders, LF research society and other researchers.

### Registration details

The study will be registered at [clinicaltrials.gov](http://clinicaltrials.gov) before inclusion of first patient

### Summary, strengths and weaknesses of this study

- PAIRR will provide pharmacokinetic data on intravenous ribavirin treatment, the current standard treatment in patients with LF.
- The results of this study will provide the basis for future dose optimization studies with the ultimate goal of improving patient care.
- A limitation of the study is, that due to ethical reasons only patients will be included who are able to give written informed consent themselves. Therefore, unconscious patients or patients with impaired consciousness will not be included, which will result in a study population not fully representative of unselected LF-patients.

## 1 List of abbreviations

|                    |                                                 |
|--------------------|-------------------------------------------------|
| ALT                | Alanine aminotransferase                        |
| AST                | Aspartate aminotransferase                      |
| AUC                | Area under the curve                            |
| BNITM              | Bernhard Nocht Institute for Tropical Medicine  |
| BUN                | Blood urea nitrogen                             |
| C <sub>max</sub>   | Maximum concentration                           |
| CRA                | Clinical research associate                     |
| CRF                | Case report form                                |
| eCRF               | electronic case report form                     |
| EC                 | European Commission                             |
| GCP                | Good Clinical Practice                          |
| GOT                | Aspartate aminotransferase                      |
| GPT                | Alanine aminotransferase                        |
| ILFRC              | Institute of Lassa fever Research and Control   |
| ISTH               | Irrua Specialist Teaching Hospital              |
| LASV               | Lassa virus                                     |
| LF                 | Lassa Fever                                     |
| PK                 | Pharmacokinetics                                |
| PD                 | Pharmacodynamics                                |
| PCR                | Polymerase chain reaction                       |
| PI                 | Principal investigator                          |
| QC                 | Quality control                                 |
| RT-PCR             | Reverse-transcription polymerase chain reaction |
| TCID <sub>50</sub> | 50% Tissue Culture Infection Dose               |
| T <sub>max</sub>   | Maximum time                                    |
| T <sub>1/2</sub>   | Half-life time                                  |
| WHO                | World Health Organisation                       |

BNITM  
Department of Tropical Medicine



## 2 Study flow chart

| STUDY EXAM                                       | Screening | First dose, day 1 | 0.5 hours post 1 <sup>st</sup> dose | 1 hour post 1 <sup>st</sup> dose | 3 hours post 1 <sup>st</sup> dose | 5 hours post 1 <sup>st</sup> dose | 8 hours post 1 <sup>st</sup> dose and administration of 2 <sup>nd</sup> dose of day 1 | 12 hours post 1 <sup>st</sup> dose | 24 hours post 1 <sup>st</sup> dose | Second day of dosing | Third day of dosing | Fourth day of dosing | 0.5 hours post dose day 4 | 1 hour post dose day 4 | 3 hours post dose day 4 | 5 hours post dose day 4 | 8 hours post dose day 4 |
|--------------------------------------------------|-----------|-------------------|-------------------------------------|----------------------------------|-----------------------------------|-----------------------------------|---------------------------------------------------------------------------------------|------------------------------------|------------------------------------|----------------------|---------------------|----------------------|---------------------------|------------------------|-------------------------|-------------------------|-------------------------|
| Visit-ID                                         | D0        |                   | D1_h 0.5                            | D1_h1                            | D1_h3                             | D1_h5                             | D1_h8                                                                                 | D1_h12                             | D1_h24                             |                      | D3                  |                      | D4_h0.5                   | D4_h1                  | D4_h3                   | D4_h5                   | D4_h8                   |
| Written informed consent                         | X         |                   |                                     |                                  |                                   |                                   |                                                                                       |                                    |                                    |                      |                     |                      |                           |                        |                         |                         |                         |
| Medical history                                  | X         |                   |                                     |                                  |                                   |                                   |                                                                                       |                                    |                                    |                      |                     |                      |                           |                        |                         |                         |                         |
| Previous medication                              | X         |                   |                                     |                                  |                                   |                                   |                                                                                       |                                    |                                    |                      |                     |                      |                           |                        |                         |                         |                         |
| Baseline characteristics                         | X         |                   |                                     |                                  |                                   |                                   |                                                                                       |                                    |                                    |                      |                     |                      |                           |                        |                         |                         |                         |
| Body temperature                                 | X         |                   | X                                   |                                  |                                   |                                   |                                                                                       |                                    | X                                  |                      | X                   |                      | X                         |                        |                         |                         |                         |
| Signs and symptoms                               | X         |                   | X                                   |                                  |                                   |                                   |                                                                                       |                                    | X                                  |                      | X                   |                      | X                         |                        |                         |                         |                         |
| Physical examination                             | X         |                   |                                     |                                  |                                   |                                   |                                                                                       |                                    |                                    |                      |                     |                      |                           |                        |                         |                         |                         |
| In/Exclusion criteria                            | X         |                   |                                     |                                  |                                   |                                   |                                                                                       |                                    |                                    |                      |                     |                      |                           |                        |                         |                         |                         |
| Blood sample for hematology/biochemistry         | X         |                   |                                     |                                  |                                   |                                   |                                                                                       |                                    |                                    |                      | X                   |                      |                           |                        |                         |                         |                         |
| Blood sample for PK/PD                           | X         |                   | X                                   | X                                | X                                 | X                                 | X                                                                                     | X                                  | X                                  |                      |                     |                      | X                         | X                      | X                       | X                       | X                       |
| Blood sample for RT-PCR and virological analyses | X         |                   |                                     |                                  |                                   |                                   |                                                                                       |                                    | X                                  |                      | X                   |                      | X                         |                        |                         |                         |                         |
| Adverse events associated with phlebotomy        |           |                   | X                                   |                                  |                                   |                                   |                                                                                       |                                    | X                                  |                      | X                   |                      | X                         |                        |                         |                         |                         |

**BNITM**  
Department of Tropical Medicine



| STUDY EXAM                                       | 12 hours post dose day 4 | 24 hours post dose day 4 | Fifth day of dosing | Sixth day of dosing | Seventh day of dosing | Eighth day of dosing | Ninth day of dosing | Tenth day of dosing | 0.5 hours post dose day 10 | 1 hour post dose day 10 | 3 hours post dose day 10 | 5 hours post dose day 10 | 8 hours post dose day 10 | 12 hours post dose day 10 | 24 hours post dose day 10 |
|--------------------------------------------------|--------------------------|--------------------------|---------------------|---------------------|-----------------------|----------------------|---------------------|---------------------|----------------------------|-------------------------|--------------------------|--------------------------|--------------------------|---------------------------|---------------------------|
| Visit-ID                                         | D4_h12                   | D4_h24                   | D5                  | D6                  | D7                    | D8                   | D9                  | D10                 | D10_h0.5                   | D10_h1                  | D10_h3                   | D10_h5                   | D10_h8                   | D10_h12                   | D10_h24                   |
| Written informed consent                         |                          |                          |                     |                     |                       |                      |                     |                     |                            |                         |                          |                          |                          |                           |                           |
| Medical history                                  |                          |                          |                     |                     |                       |                      |                     |                     |                            |                         |                          |                          |                          |                           |                           |
| Previous medication                              |                          |                          |                     |                     |                       |                      |                     |                     |                            |                         |                          |                          |                          |                           |                           |
| Baseline characteristics                         |                          |                          |                     |                     |                       |                      |                     |                     |                            |                         |                          |                          |                          |                           |                           |
| Body temperature                                 |                          | X                        |                     | X                   | X                     | X                    | X                   |                     | X                          |                         |                          |                          |                          |                           | X                         |
| Signs and symptoms                               |                          | X                        |                     | X                   | X                     | X                    | X                   |                     | X                          |                         |                          |                          |                          |                           | X                         |
| Physical examination                             |                          |                          |                     |                     |                       |                      |                     |                     |                            |                         |                          |                          |                          |                           |                           |
| In/Exclusion criteria                            |                          |                          |                     |                     |                       |                      |                     |                     |                            |                         |                          |                          |                          |                           |                           |
| Blood sample for hematology/biochemistry         |                          | X                        |                     |                     | X                     |                      | X                   |                     |                            |                         |                          |                          |                          |                           |                           |
| Blood sample for PK/PD                           | X                        | X                        |                     |                     |                       |                      |                     |                     | X                          | X                       | X                        | X                        | X                        | X                         | X                         |
| Blood sample for RT-PCR and virological analyses |                          | X                        |                     |                     | X                     |                      | X                   |                     | X                          |                         |                          |                          |                          |                           |                           |
| Adverse events associated with phlebotomy        |                          | X                        |                     | X                   | X                     | X                    | X                   |                     | X                          |                         |                          |                          |                          |                           | X                         |

## Introduction

### Background

Lassa fever (LF) is an acute febrile illness associated with bleeding, organ failure, and shock caused by the Lassa virus (LASV) (arenavirus) [1]. The virus reservoir is the commensal rodent *Mastomys natalensis* [2]. LASV is also transmitted from human to human and may cause nosocomial outbreaks with case fatality rates of up to 60% [3].

A large number of low and middle-income countries (LMICs) of the West African region is affected by LF: Ghana, Guinea, Mali, Benin, Liberia, Sierra Leone, Togo and Nigeria. The proportion of hospital admissions due to LF may reach 15% in endemic zones [4-6]. Fatal cases are associated with high viremia, liver damage, renal failure, bleeding, encephalopathy, and a shock-like syndrome [4, 7-10]. Health systems in areas where the disease is endemic but also in developed countries are overwhelmed due to the lack of LF diagnostics, the risk of nosocomial transmission, and the limited treatment options.

Following the Ebola virus disease crisis, the World Health Organization (WHO) has initiated the research and development (R&D) Blueprint as a global strategy and preparedness plan to ensure that targeted R&D brings medical technologies to patients during epidemics [11]. The WHO and international experts have agreed on a list of priority diseases for urgent R&D which also includes LF. The WHO recognises that there is insufficient research for epidemic-prone diseases mainly affecting LMICs. The research needs of LMICs span from “proof of principle/preclinical studies to the implementation and regulation of clinical studies, innovative strategies for the production of health technologies, development of key enabling capacities, such as pathogenesis studies of the priority pathogens and surveillance methodologies, and regulatory science needed to enhance regulatory preparedness” [11].

In Nigeria, LF case management centres are only operational in three out of 36 states. LF outbreaks occur annually but have recently started becoming a major threat. At the beginning of 2018 Nigeria experienced the largest outbreak of LF ever with hundreds of recorded clinical cases [12].

### Lassa fever in Irrua

The Irrua Specialist Teaching Hospital in Irrua, Edo State, Nigeria (ISTH) is located in a hyperendemic area for LF [10, 13, 14]. Molecular LF diagnostics is performed on a daily basis. The laboratory has also been instrumental in the diagnosis of LF outbreaks in several other

## BNITM

Department of Tropical Medicine



states of the country. BNITM and ISTH are partners in various networks and projects, such as European and Developing Countries Clinical Trials Partnership-funded projects and the European Commission (EC)-funded European Mobile Laboratory project.

### Literature review

The only drug with a proven therapeutic effect in humans with LF is the broad-spectrum nucleoside analogue ribavirin. Ribavirin reduces replication of LASV at concentrations between 10 µg/ml and 50 µg/ml in cell culture, and shows efficacy in LASV-infected monkeys [15-18]. Initiation of treatment within 5 days after inoculation protected all monkeys, while initiation of treatment at day 7 conferred only partial protection. In treated animals, viremia developed more slowly and peaked at lower titres than in untreated controls [15, 16]. The mode of action of ribavirin against LASV is not clear. Recently, it has been shown with other RNA viruses that ribavirin can be incorporated into the RNA strand leading to lethal mutagenesis of progeny genomes [19, 20]. It is assumed that, if the mutation rate is too high, the genetic information cannot be maintained and the virus population goes into extinction. This process is called lethal mutagenesis or error catastrophe.

Evidence for the currently recommended ribavirin treatment adds up to one clinical study by McCormick et al. published in 1986 [21]. In patients with a high risk of fatal outcome (aspartate aminotransferase (AST/GOT) values  $\geq 150$  U/l), initiation of treatment within 6 days after onset of fever reduced the case fatality rate from 55% to 5% [22]. Similarly, in patients with high viremia ( $\geq 10^{3.6}$  TCID<sub>50</sub>/ml (50% Tissue Culture Infection Dose per millilitre)), treatment reduced the case fatality rate from 76% to 9%. Even if treatment was initiated at day 7 or later, the case fatality could be reduced in these groups to 26% and 47%, respectively. No major differences were seen between oral and intravenous treatment. When, however, reviewing the publication thoroughly, several deficits become apparent. Research participants had not been randomized to either control or treatment group but a historic cohort of untreated patients was taken as control group. The treatment group was further separated into several subgroups with different treatment options (oral ribavirin, intravenous ribavirin, convalescent plasma) and different time points of treatment (within 6 days after onset of symptoms or later). The authors yet did not describe how patients had been allocated to the different subgroups and whether allocation had happened before or after inclusion in the study. There was, furthermore, a questionable deviation from the planned research design as subgroups were merged together after the end of the study. Additionally, total participant numbers in treatment and control

**BNITM**

Department of Tropical Medicine



groups remain unclear. Still, despite these serious biases this study is taken as reference for LF treatment since more than 30 years [22]. The dose used in the 1986 study is recommended by WHO for treatment of LF [23]. However, no data exist about the rationale for this dose, the achieved ribavirin blood levels under this dose, or the efficacy and pharmacokinetics (PK) of other dosing schemes. Clinical experience and expert opinion in the endemic countries agree with the results but scientific evidence is still largely lacking behind.

Based on the highest case load of LF patients in any institution in Nigeria, ISTH developed a ribavirin regimen different from the WHO recommendation which is here referred to as “Irrua regimen” or “Irrua ribavirin treatment regimen” [24]. Apart from a higher loading dose and a lower total daily dose administered during the course of the Irrua regimen, the drug is usually administered once per day which reduces the exposure of the personnel to LF diseased patients.

### Rationale for this project

LF is a dangerous infection with a high lethality rate. During the past years, cases of LASV infection increased markedly and more evidence on an efficacious therapy of this disease is direly needed. The standard treatment for LF patients is ribavirin, as the study by McCormick et.al demonstrated efficacy of ribavirin in reducing the fatality rate of LF; Ribavirin also increases survival in in-vivo animal models of LASV infection [25]. Ribavirin at ISTH is used at a dose that deviates from the WHO recommendation. From clinical experience, the standard Irrua regimen of ribavirin is postulated to be efficacious yet an easier to use and a safer alternative to the McCormick regimen. However, to our knowledge, the PK properties of the Irrua ribavirin regimen have never been described. It is not known if this dose reaches blood levels that would be sufficient to exert an antiviral effect in the patients. Therefore, in this prospective observational study we aim to obtain evidence on ribavirin PKs in patients who receive the Irrua ribavirin regimen as standard of care at ISTH. The Irrua regimen entails the following ribavirin dosages for intravenous use:

- 1) Start dose (day 1): 100 mg/kg; If this start dose is > 6g then 2/3 of the dose will be given straight away and the remaining 1/3 is administered 8 hours later.
- 2) Days 2-5: 25mg/kg/day once daily
- 3) Days 6-10: 12.5mg/kg/day once daily

Data derived from this observational study will serve as basis for further clinical studies studying the efficacy and safety of ribavirin and provide the possibility to compare the Irrua regimen with alternative treatment candidates and regimen. This will serve as basis for further

**BNITM**

Department of Tropical Medicine



dose optimization of ribavirin helping to further ameliorate the management of LF patients in the endemic regions. This work is thus an important cornerstone for the development and implementation of a treatment standard and evidence-based treatment recommendations for LF.

**Primary research question**

What are the PK properties of ribavirin administered as per the Irrua ribavirin treatment regimen to LF patients?

**Study objectives****General objective**

The aim of this study is to describe the PK properties of ribavirin when administered in routine care under the Irrua dosing regimen in patients with polymerase chain reaction (PCR) confirmed LF, to generate an evidence base for the use of the said regimen and to inform further studies regarding the efficacy of ribavirin, possibly in comparison and combination to other anti-viral agents.

**Specific objectives****Primary objective:**

1. Describe the classical PK parameters for ribavirin (maximum concentration (C<sub>max</sub>), maximum time (T<sub>max</sub>), area under the curve (AUC), half-life time (T<sub>1/2</sub>), volume of distribution) in LF patients treated with the Irrua ribavirin regimen.

**Secondary objectives:**

2. Examine the clinical, hematological, biochemical parameters of the patients and correlate them with ribavirin blood levels.
3. Study the kinetics of LASV loads in blood by reverse-transcription polymerase chain reaction (RT-PCR) and describe the association of drug exposure with the viral kinetics.
4. Determine LASV sequences and sequence changes during the treatment that might point towards resistant mutants or to increased error rate induced by the nucleoside analogue ribavirin
- 5.

## Methods and Analysis

### Study design

A prospective, observational and descriptive clinical study will be conducted to assess the PK properties of the Irrua ribavirin regimen on routinely ribavirin treated LF patients at the Lassa fever isolation ward of ISTH that will be included following provision of written informed consent.

### Primary endpoint

PK parameters of the routine care ribavirin regimen at ISTH

### Secondary endpoints

- a. Clinical, hematological and biochemical safety and tolerability of the routine Irrua regimen
- b. Viral kinetics in patients routinely treated with the Irrua ribavirin regimen
- c. LASV genome changes under the Irrua ribavirin regimen

### Study site

The Lassa Unit of the ISTH in Edo State is one of the three operating LF case management centers with an adjacent laboratory that conducts PCR testing (<http://www.who.int/csr/don/20-april-2018-lassa-fever-nigeria/en/>, accessed 04DEC2019). It is a referral hospital serving 19 local governmental areas in an LF endemic zone and one of the few hospitals in West Africa that feature facilities for diagnosis, research, and treatment of LF. The Institute of Lassa fever Research and Control (ILFRC) at ISTH performs molecular LF diagnostics on a daily basis since 2008. A LF clinic for appropriate patient management was commissioned in 2010. Up to 2,000 suspected patients are tested each year of which 100-200 test positive for LASV. Most of them are treated at the ISTH Lassa ward. BNITM and ISTH established a Training and Clinical Trial Center that features laboratory facilities for GCLP conform processing of samples from clinical studies, including real-time RT-PCR for virus load monitoring, serology, and sequencing. These facilities shall be further upgraded and used for this study.

BNITM

Department of Tropical Medicine



## Study population and selection criteria

### Study population

The study population consists of LF patients presented and routinely treated for LF on the Lassa isolation ward of ISTH which fit the below detailed selection criteria of the study.

### Sample size

A sample size of 20 evaluable patients as defined by sponsor is proposed. The sample size and sampling design was evaluated using stochastic clinical trial simulation and estimation (SSE) in NONMEM® (v. 7.4, ICON development solutions, Hanover, USA). In the SSE approach, population PK parameters including their intra- and interindividual variability of a published two compartment model [26] were used and 500 clinical trials with the proposed sampling design (0.5, 1, 3, 5, 8, 12 and 24 h after the first, fourth and tenth dose) were simulated using the Irrua dosing regimen. The population PK parameters were re-estimated and compared against the known values from the simulation step.

For PK the proposed sampling design will allow the determination of the structural PK parameters with low absolute relative bias (< 2.4%) and low imprecision (<17%). The design also supports adequate estimation of the PK variability components (inter-individual variability: absolute relative bias <6.8%, imprecision: <33.2%; intra-individual variability: absolute relative bias <-0.3%, imprecision: 2.5%).

To evaluate the potential link between PK and PD (pharmacodynamic) (viral kinetics) in the exploratory analysis, the model used in the SSE was extended by an assumed PD component (ribavirin stimulating a first-order decay of viral load). Daily sampling (where coinciding with the safety assessment, otherwise every other day as outlined in the study flow chart) of viral load will allow to detect even weak exposure response relations. For example, a ribavirin-induced decline in viral load with a viral elimination half-life of 480 h compared to no effect assuming high interpatient variability in PD response of 70% and a PD measurement error of 30% will be detectable at a power of 99 % with adequate accuracy (absolute relative bias <17.3 %) and imprecision (< 33.2%).

## BNITM

Department of Tropical Medicine



### Selection criteria

#### Inclusion criteria

- Age  $\geq$  18 years
- LF confirmed by RT-PCR
- Written informed consent
- Anticipated treatment with intravenous ribavirin

#### Exclusion criteria

- Inability to give consent (e.g. unconscious patients/ cognitively impaired patients)
- Critical illness (based on investigator's clinical evaluation)
- Severe malnutrition
- Hemodialysis
- History of hemophilia / bleeding disorder
- Hematocrit  $<30\%$
- History of hemoglobinopathies (i.e., sickle-cell anaemia or thalassemia major)
- Known intolerance to ribavirin
- Known pregnancy
- Women who plan to get pregnant within the upcoming 3 months
- Patients who already received ribavirin within the last 7 days

#### Enrolment

Recruitment of patients and inclusion in the study will be performed at the study centre during the consultation on Day 0 by an investigator who is not involved in the standard of care treatment of the patients. Vulnerable patients such as pregnant women and minors will be excluded from the research because they should not be exposed to the additional burden of drawing more blood than necessary. Cognitively impaired patients will be excluded because they cannot make an informed consent about the study participation. Furthermore, children and pregnant women do not receive ribavirin intravenously but orally and are therefore not eligible for enrolment. Patients who fulfill selection criteria are eligible and will be proposed to participate. The patients will be informed in writing and orally about the study and they will have time to address possible questions to the investigator. They will have time to consider their participation in the study. Inclusion will follow the provision of voluntary written informed consent of the patient or the impartial witness in case of illiteracy.

## BNITM

Department of Tropical Medicine



A unique identifier (unique participant number) will be allocated and demographic baseline data including date of birth, sex, weight and height will be collected and documented in a study specific electronic case report form (eCRF). Patients then continue the routine standard care. The enrolment period corresponds to the period of hospitalization at the Lassa isolation ward but is limited to 11 days.

### Study limitations

The potential bias in this study include

- a. missing samples or insufficient sample volume to perform laboratory tests
- b. early withdrawal due to death, medical condition contraindicating the collection of blood or premature termination of intravenous ribavirin administration due to clinical improvement and switch to oral treatment based on physicians' discretion
- c. inclusion of non-severe LF cases, which may not be directly representative of patients with severe organ failure

### Study duration

The enrolment period corresponds to the length of the participant's stay at the study site until they are discharged but is limited to a duration of 11 days. The common duration for LF treatment is 10 days. The study itself is intended to start in January 2020 and it is supposed to end in September 2020.

During the course of a research project, new information may become available that impacts the research. If this happens, the investigator will tell the participants about it and discuss with them whether they want to continue in the research project. If they decide to withdraw, the investigator will make arrangements for their regular health care to continue. If they decide to continue in the study they will be asked to sign an updated consent form.

Also, on receiving new information, the investigator might consider it to be in the participants' best interests to withdraw them from the research project. If this happens, he/ she will explain the reasons and arrange for their regular health care to continue

1 BNITM

2 Department of Tropical Medicine



3  
4 **Study procedures**

5  
6 The study procedures are applied by designated trained staff of ISTH, BNITM, University of  
7 Hamburg, and Ambrose Alli University (AAU, Ekpoma, Nigeria) within their usual work scope  
8 since this is an observational study and the research team is not involved in decisions regarding  
9 the participant's treatment. This study's personnel will receive a reasonable and adequate  
10 financial compensation for the time and risk/hazards involved in this research.  
11  
12

13  
14  
15 **Data acquisition**

16  
17 Baseline data (age, sex, medical history, concomitant medication, concomitant treatment,  
18 pregnancy status, weight, height, physical examination) will be collected on study specific  
19 eCRFs. Body temperature will be measured and signs and symptoms of LF (such as fatigue,  
20 diarrhea, nausea, vomiting, abdominal pain, bleeding, chest pain, hearing problems and  
21 decreased vision) will be assessed daily (during study visits indicated in the study flow) and  
22 documented in the eCRF.  
23  
24  
25  
26

27  
28 **Blood sampling and analysis**

29  
30 Blood will be taken by laboratory staff of ISTH. Appropriate training in phlebotomy, with the  
31 aim to reduce the burden and risk on participants will be provided to all personnel involved  
32 prior to the commencement of the trial. A peripheral venous catheter will be inserted on days  
33 where more than two blood draws are necessary. Before each blood withdrawal the catheter  
34 will be rinsed and the first 3 ml will be discarded to ensure adequate quality of the blood. At  
35 the end of the study, leftover material will be stored at ISTH and BNITM.  
36  
37  
38

- 39  
40 - 4 ml EDTA blood for PK and RT-PCR analyses  
41  
42 - 3 ml of EDTA blood for hematology analyses (and RT-PCR analyses in case of routine  
43 hematology blood draw)  
44  
45 - 3 ml of heparin blood for biochemistry analyses  
46  
47 - 2 ml EDTA blood for RT-PCR analyses and serology  
48  
49 - 2ml EDTA blood for PK analyses  
50

51 In total approximately 160 ml blood (corresponding to approximately 11 tablespoons of blood)  
52 will be withdrawn within the scope of the study whereof 42 ml (approx. 3 tablespoons) are part  
53 of the routine practice and 117 ml (approx. 8 tablespoons) are additional withdrawals due to the  
54 study participation. This total amount of blood which will be withdrawn does not exceed the  
55 maximum allowable total blood draw volumes for clinical research studies [27].  
56  
57  
58  
59  
60

## BNITM

Department of Tropical Medicine



### Bioanalysis / Ribavirin PK

Blood samples will be collected at 0.5, 1, 3, 5, 8, 12 and 24 hours after the doses on day 1, day 4 and day 10 of ribavirin treatment. Additionally, it will be collected during screening before the first dose of ribavirin. Blood samples will be centrifuged and the plasma supernatant will be frozen at  $-80^{\circ}\text{C}$  within 2 h after blood sampling. Plasma samples will be shipped frozen to BNITM for viral inactivation using a validated protocol. The samples will then be shipped to the bioanalysis site (Dept. of Clinical Pharmacy, Institute of Pharmacy, University of Hamburg, Germany). There, ribavirin plasma concentrations will be determined using liquid chromatography coupled to tandem mass spectrometry.

### RT-PCR analysis / Virological response

EDTA blood will be sampled at recruitment, 24 hours and then at study visits outlined in the study flow chart until the end of treatment. Blood will be processed directly to analyse viral load by qRT-PCR. Samples will be aliquoted, frozen and securely stored at ISTH until transported to BNITM at certain time points.

Assays such as the enzyme-linked immunosorbent assays (ELISA) and/or immunofluorescence assays will be used to determine LASV specific IgM and IgG, as well as further IgG sub-classification, and to monitor the development of LASV specific antibodies in blood. Viral growth, isolation of Lassa virus in cell culture, virus sequencing and unbiased metagenomic sequencing will be used to study the longitudinal impact of drug treatment (ribavirin) on Lassa virus genomes. Sequence analysis shall be done at both ISTH and BNITM.

Laboratory analyses requiring the use of a Biosafety Level 4 laboratory (virus isolation) will be performed at the BNITM. Aliquots of samples will be shipped to BNITM according to UN2814 regulations.

### Hematological and biochemical safety and tolerability

Blood will be sampled at baseline and then every second day until the tenth day of dosing at timepoints indicated in the study flowchart. Full blood count and biochemistry will be performed. Biochemistry analysis will include creatinine, creatine kinase, uric acid, blood urea nitrogen (BUN), alanine aminotransferase (ALT/GPT), aspartate aminotransferase (AST/GOT), bilirubin,  $\gamma$ GT, amylase and serum electrolytes. Biochemical and hematological assays will be conducted by ISTH and AAU staff during the course of routine safety sampling.

BNITM

Department of Tropical Medicine



## Participant safety

This is a non-interventional observational study with minimal study related risk for the participant. The biological risk in this study is limited to repeated draws of small amounts of venous blood. This risk encompasses local pain at the venepuncture site, the risk for the development of local haemorrhage due to the blood sampling and bleeding. However, even in haemorrhagic participants bleeding can be stopped by mechanical compression.

Insertion of IV catheters for repeat blood draws is associated with risk of local and systemic infection as in routine procedure. No further biological risks are associated with this observational study for the participants. The designated study monitor will monitor the data to ensure data reliability and patients' safety. An independent medical monitor will monitor the participants' safety data.

Before the start of the study, the personnel will receive trainings in Good Clinical Practice (GCP), research ethics, study procedures and phlebotomy. The study team will consist of personnel which is trained in supportive care of LF patients.

## Adverse events (AE) associated with phlebotomy

### General definition of AE

An AE is any untoward medical occurrence in a patient or clinical investigation subject administered a pharmaceutical product and which does not necessarily have a causal relationship with this treatment. An AE can therefore be any unfavourable and unintended sign (including an abnormal laboratory finding), symptom, or disease temporally associated with the use of a medicinal (investigational) product, whether or not related to the medicinal (investigational) product.

### Assessment of adverse events in this study

In this study only adverse events which are unfavourable and/or unintended signs, symptoms temporally associated with phlebotomy will be captured. This will be recorded in the participant case report form.

Clinical signs typical of LF will not be considered AEs unless the healthcare personnel considers these events as exceptional due to their evolution, their seriousness, or another factor related to these events.

## Severity

The investigator will assess the severity/intensity of the adverse events using the following guidelines:

- Mild: awareness of sign or symptom, but easily tolerated
- Moderate: enough discomfort to cause interference with usual activity
- Severe: incapacitating with inability to work or do usual activity
- Life-threatening

## Action taken

- Patient withdrawn from study
- Concomitant medication required
- Hospitalization required or prolonged
- Other

## Outcome

The investigator will follow-up the adverse event until resolution or until no further medically relevant information can be expected. Adverse event outcome will be classified as follows:

- Resolved
- Resolved with sequelae
- Continuing
- Death

## Quality control and quality assurance

### Quality assurance

To ensure the quality and accuracy of the data, qualified investigators and study personnel will be selected. The protocol procedures will be reviewed with the investigators and associated personnel before the start of the study. Written instructions will be provided for collection, preparation, and shipment of blood samples. The samples will be shipped following IATA (dangerous goods regulations) for the transport of category A samples (UN2814), or category B (UN3373) or exempt specimen, with dry ice (UN1845). A designated Clinical Research Associate (CRA) will monitor study progress to facilitate compliance with GCP which requires reported data to be accurate, complete and verifiable from source documents and that the study

## BNITM

Department of Tropical Medicine



1  
2  
3  
4 follows the current approved protocol and applicable regulatory and laboratory requirements.  
5 The monitoring activities will be a centralized monitoring which is both onsite and remote  
6 monitoring.  
7

8  
9 In the case of onsite monitoring, source data such as eCRF, ICF and other participant data will  
10 be reviewed for accuracy and completeness and any discrepancies will be resolved with the  
11 Principal Investigator (PI) or his/her designee, as appropriate.  
12  
13

### Quality control of data on site

14  
15 In order to ensure quality of data, several quality control (QC) measures will be put in place.  
16 Data will only be collected on validated study specific eCRFs and logs. A stringent query  
17 process will be applied for the documentation of data. Study personnel will be trained in data  
18 acquisition and documentation.  
19  
20  
21  
22  
23

### Data management and storage

24  
25 Data will be captured on study specific password-protected eCRF on tablets located in the Lassa  
26 isolation ward. The PI will be responsible for accuracy of the data. Participants data will only  
27 be linked to the unique identifier to ensure pseudonymity. The database will be made accessible  
28 only to dedicated staff from the institutions involved in the study. Biological samples and  
29 information will be stored for 10 years after the study results have been published. Direct access  
30 to source documentation (medical records) must be given to officials from ethics committees,  
31 regulatory authorities and from the sponsor for the purpose of verifying that the data recorded  
32 in the electronic database are consistent with the original source data. The research data will  
33 not be kept in the medical records of the patients. This would breach with confidentiality of  
34 data. Only exception: If results of the study parameters (e.g. biochemical analysis) may have  
35 implication for clinical care of research participants, a copy will be provided to the responsible  
36 physician and the test result will be made available for routine care and kept in the medical  
37 records. The study identifier of this copy will be erased manually  
38  
39  
40  
41  
42  
43  
44  
45  
46  
47  
48  
49  
50  
51  
52  
53  
54  
55  
56  
57  
58  
59  
60

1 BNITM

2 Department of Tropical Medicine



## 3 4 Statistical analyses

5  
6 The statistical data analyses will be performed using an appropriate software package.

## 7 8 9 Statistical methods

10  
11 PK parameters will be analysed descriptively. PK/PD analyses will be performed by employing  
12 mathematical models including potential covariates on the impact of drug exposure on viral  
13 kinetics.  
14  
15

## 16 17 18 Description of classical PK parameters

19  
20 A non-compartmental analysis (e.g. using Phoenix WinNonlin) will be performed to elucidate  
21 the classical PK parameters (AUC, CL, half-life, Volume of distribution).  
22  
23

## 24 25 26 Population PK model

27  
28 A full population PK model will be developed, with the goal to characterize the typical PK  
29 parameters of ribavirin and PK variability. Linear as well as non-linear compartmental PK  
30 models will be tested using non-linear mixed-effects modelling using NONMEM®. Once a  
31 suitable structural and variability model is built, all participant data will be used to find  
32 covariates significantly determining the interindividual variability in PK.  
33  
34

35  
36 In particular, we will analyse the changes in ribavirin concentration and hemoglobin levels,  
37 alanine aminotransferase (ALT/GPT), and uric acid. For that purpose, a PK/tolerance model  
38 will be developed in order to relate the effect of the drugs on changes in longitudinal biological  
39 parameters as described previously for ribavirin in HCV patients [28].  
40  
41  
42  
43

## 44 45 46 PK-pharmacodynamic modelling

47  
48 The PK data will be linked to the available PD data (viral kinetics). We aim to evaluate the  
49 effect (or the lack of effect) of ribavirin monotherapy on the Lassa viral kinetics. Semi-  
50 mechanistic modelling of the effect time-courses [29] will be performed using non-linear  
51 mixed-effects modelling in NONMEM® and 'R'.  
52  
53  
54

## 55 56 57 Protocol deviation/ violation and exclusion from analysis set

58  
59 Protocol deviations will be defined as non-compliance with the protocol by the investigator  
60 team that are not considered protocol violations (e.g. missing one blood sample). Protocol

## BNITM

Department of Tropical Medicine



violation will be defined as non-compliance to the protocol which reduces the quality or completeness of the data, makes the ICF inaccurate, or impacts a participant's safety, rights, or welfare. A protocol violation constitutes serious non-compliance and may lead to exclusion of participants from eligibility analysis and/or their discontinuation from the study.

## Handling of missing data and outliers

No imputation will be applied. Missing data will be treated as such.

## Exploitation of study results

All results, data, documents and inventions obtained, directly or indirectly, from the study, will be owned by the sponsor and the PI's department unless a law or local regulation states otherwise. The sponsor can use or exploit all results for their own use without any limitation of its industrial property (territory, area, duration) in consultation with the study centre. The full database will be the property of the sponsor and the PI's department and will be utilized for producing the final study report. The PI's department will have the right to participate with the sponsor in the publication of such results.

## Data presentation

The results of the study will be made available for the sponsor and the investigator. The sponsor and the investigator will share the responsibility for the presentations and/or publications of the results. The final decision on the publication of a manuscript/summary/presentation will be taken by the sponsor and the investigator together following an internal review with the possibility of providing comments.

The participants will be informed about any information that may affect their continued participation or their health during the course of the study. The outcome of the research will be made available to ISTH, the participants upon individual request and with the scientific community to improve future management of LF.

## Responsibilities

### Responsibilities of the study site

The study personnel shall be responsible for performing the study in accordance with this protocol and in accordance with the legislation and international guidelines under the direction of the local PI.

## BNITM

Department of Tropical Medicine



They are responsible for obtaining written informed consent prior to inclusion in the study, completing the study documents and recording all relevant data in relation to the study. Each study team member shall ensure that the information reported in the document is precise and accurate. The study personnel must inform the participant on all relevant aspects of the study, including the information in the participant information sheet. All this information shall be provided to the participant in layman's terms. Participant's confidentiality is paramount.

Prior to study inclusion, the informed consent form will have to be personally completed (first name, surname), dated and signed by the participant. The person who has conveyed the information on the study to the participant shall also sign and date the informed consent form approved by the Ethics Committee.

In the case where participant is unable to read and sign the participant information sheet and informed consent form, these documents will be read and explained to the participant in the local language in the presence of a witness. The participant shall put her/his fingerprint on the informed consent form and the witness shall also sign the consent form to confirm that the participant has consented willingly. A copy of the information sheet and the signed consent form shall be handed over to the participant.

### Responsibility of the sponsor

The study sponsor's responsibility is toward the study team at the study site and the health authorities and shall take all reasonable measures to ensure the good conduct of the study with regards to ethics, protocol compliance, integrity and validity of the information recorded in the participant eCRF, as well as with regards to the availability of the adequate resources to ensure appropriate conduct of the study. The principal function of the study management team is to help the investigator and the sponsor to maintain a high level of ethical, scientific, technical and regulatory standards for all study-related aspects of ethics, regulations and administrative rules.

### Ethical consideration

#### Regulations

The study shall be conducted in compliance with the Declaration of Helsinki adopted by the 18th World Medical Association Assembly in 1964, and with its amendments as well as with the Nigerian National Code for Health Research Ethics (<http://nhrec.net/>). This study shall be conducted in accordance with the principles of the Good Clinical Practices as well as in compliance with the international and national laws and regulations in effect and in accordance

**BNITM**

Department of Tropical Medicine



with the applicable directives in Nigeria, in particular concerning the submission to the ethics committee and the protection of personal data.

**Ethics Approval**

The study has been approved by the Health Research Ethics Committee of Irrua Specialist Teaching Hospital.

**Patient and public involvement**

Patients and general public were not involved in the conception and design of this study protocol. However, the concept of the study was clearly driven by the aim to close knowledge gaps and generate evidence that is currently missing during routine care of LF patients.

**Site clearance**

Upon signature of the protocol, the PI accepts to respect the instructions and procedures described in the protocol, as well as the Good Clinical Practices and Good Laboratory Practices, to which he/she conforms.

BNITM

Department of Tropical Medicine



## Participant informed consent

The PI is responsible for ensuring that informed consent is obtained from each participant and obtaining the appropriate signatures and dates on the informed consent document prior to the performance of any protocol procedures. The investigator shall explain to each study participant the nature of the study, its objective, the procedures involved, its risks and potential benefits and any discomfort it may generate [24]. This investigator is independent from the standard of care treatment of research participants. The participant will sign on the informed consent sheet after having read and voluntarily agreed to it. Where the participant is unable to read, an impartial witness should be present during the entire informed consent discussion. After inclusion, the participant may elect to withdraw from the study when he/she so wishes. The same level of attention will be dispensed to that individual. The investigator shall obtain from the participant a signed (fingerprint and signature from a witness for participants unable to read and write), written consent. If informed consent is not obtained, the patient will not be enrolled. If during the course of the research project new information become available about the treatment/the disease that is being studied, the investigator will tell the participant about it and discuss with him/her whether he/she wants to continue in the research project. If the participant decides to withdraw, the investigator will make arrangements for the regular health care to continue. If the participants decide to continue in the research project, he/she will be asked to sign an updated consent form.

Also, on receiving new information, the investigator might consider it will be in the participant's best interests to withdraw him/her from the research project. If this happens, the investigator will explain the reasons and arrange for the regular health care to continue.

## Pseudonymity, confidentiality and data protection

To ensure pseudonymity of study participants, an identification number will be attributed to each participant at the time of study entry. This unique identifier will be used for the identification of study specific documentation and labelling of samples throughout the study as well as for documentation of the electronic database.

To ensure confidentiality of the information collected eCRFs and laboratory documentation will be kept in a locked room with restricted access. The electronic database will only be accessible with a password. Only designated study personnel, the sponsor and the sponsor's delegate will have access to these documents.

## Voluntariness

The participant must be informed that his/her participation is entirely voluntary, that he/she can withdraw from the study at any time and that withdrawal will not affect his/her subsequent medical treatment nor his relationship with the treating physician. If participants withdraw from the study, they will be asked whether information that has been obtained about them before they have chosen to withdraw may be used for analysis and hence may be included in reports and publications. If participants also withdraw their consent for data processing, all obtained data from them will be excluded from further analysis and processing.

## Incentives

No financial incentives will be given in return of participating to the study due to the risk of manipulation and coercion. As incentive for taking part in the study, participants will receive one impregnated mosquito net during their last appointment. Furthermore, the research participants will be provided with protein bars to balance the loss of proteins due to multiple blood drawing. In exceptional circumstances, additional material incentives such as fruit juice, candies or phone credits might be provided.

### **Contributorship statement:**

CE, SO, EO, SG, MR and MG designed the study and drafted the protocol. All authors wrote on and reviewed the study protocol and will be involved in patient care, sample processing or data analysis during the study.

### **Competing interests:**

None of the authors reported competing interest

### **Funding:**

This research is funded as part of the Global Health Protection Programme (GHPP) of the German Federal Ministry of Health, project ZMVI1-2519GHP704

### **Data sharing statement:**

Project at protocol stage. There has no data been generated yet. Data will be made available upon request.

BNITM

Department of Tropical Medicine



## References

1. Frame, J.D., et al., *Lassa fever, a new virus disease of man from West Africa. I. Clinical description and pathological findings*. Am J Trop Med Hyg, 1970. **19**(4): p. 670-6.
2. Monath, T.P., et al., *Lassa virus isolation from Mastomys natalensis rodents during an epidemic in Sierra Leone*. Science, 1974. **185**(4147): p. 263-5.
3. Fisher-Hoch, S.P., et al., *Review of cases of nosocomial Lassa fever in Nigeria: the high price of poor medical practice*. BMJ, 1995. **311**(7009): p. 857-9.
4. McCormick, J.B., et al., *A case-control study of the clinical diagnosis and course of Lassa fever*. J Infect Dis, 1987. **155**(3): p. 445-55.
5. Bausch, D.G., et al., *Lassa fever in Guinea: I. Epidemiology of human disease and clinical observations*. Vector Borne Zoonotic Dis, 2001. **1**(4): p. 269-81.
6. Frame, J.D., *Clinical features of Lassa fever in Liberia*. Rev Infect Dis, 1989. **11 Suppl 4**: p. S783-9.
7. McCormick, J.B., et al., *Lassa virus hepatitis: a study of fatal Lassa fever in humans*. Am J Trop Med Hyg, 1986. **35**(2): p. 401-7.
8. Johnson, K.M., et al., *Clinical virology of Lassa fever in hospitalized patients*. J Infect Dis, 1987. **155**(3): p. 456-64.
9. Cummins, D., et al., *Lassa fever encephalopathy: clinical and laboratory findings*. J Trop Med Hyg, 1992. **95**(3): p. 197-201.
10. Asogun, D.A., et al., *Molecular diagnostics for lassa fever at Irrua specialist teaching hospital, Nigeria: lessons learnt from two years of laboratory operation*. PLoS Negl Trop Dis, 2012. **6**(9): p. e1839.
11. World Health Organisation. *A research and development Blueprint for action to prevent epidemics*. 2018 FEB 2018 27JUL2018]; Available from: <http://www.who.int/blueprint/en/>.
12. World Health Organisation. 2018 07MAY2018]; Available from: <http://www.who.int/csr/don/20-april-2018-lassa-fever-nigeria/en/>.
13. Ehichioya, D.U., et al., *Current molecular epidemiology of Lassa virus in Nigeria*. J Clin Microbiol, 2011. **49**(3): p. 1157-61.
14. Olschlager, S., et al., *Improved detection of Lassa virus by reverse transcription-PCR targeting the 5' region of S RNA*. J Clin Microbiol, 2010. **48**(6): p. 2009-13.
15. Jahrling, P.B., et al., *Lassa virus infection of rhesus monkeys: pathogenesis and treatment with ribavirin*. J Infect Dis, 1980. **141**(5): p. 580-9.
16. Jahrling, P.B., C.J. Peters, and E.L. Stephen, *Enhanced treatment of Lassa fever by immune plasma combined with ribavirin in cynomolgus monkeys*. J Infect Dis, 1984. **149**(3): p. 420-7.
17. Stephen, E.L. and P.B. Jahrling, *Experimental Lassa fever virus infection successfully treated with ribavirin*. Lancet, 1979. **1**(8110): p. 268-9.
18. Dvoretzkaia, V.I., et al., *[Comparative evaluation of the antiviral efficacy of virazole and ribamidil in experimental Lassa fever in monkeys]*. Vopr Virusol, 1990. **35**(2): p. 151-2.
19. Crotty, S., C.E. Cameron, and R. Andino, *RNA virus error catastrophe: direct molecular test by using ribavirin*. Proc Natl Acad Sci U S A, 2001. **98**(12): p. 6895-900.
20. Crotty, S., et al., *The broad-spectrum antiviral ribonucleoside ribavirin is an RNA virus mutagen*. Nat Med, 2000. **6**(12): p. 1375-9.
21. McCormick, J.B., et al., *Lassa fever. Effective therapy with ribavirin*. N Engl J Med, 1986. **314**(1): p. 20-6.
22. Eberhardt, K.A., et al., *Ribavirin for the Treatment of Lassa Fever: A Systematic Review and Meta-Analysis*. Int J Infect Dis, 2019.
23. World Health Organisation, *Application for inclusion of ribavirin in the WHO model list of essential medicines*. 2006.
24. Nigeria Centre for Disease Control, *National guidelines for Lassa Fever cases management*. 2018. p. 13.

## BNITM

Department of Tropical Medicine



25. Oestereich, L., et al., *Efficacy of Favipiravir Alone and in Combination With Ribavirin in a Lethal, Immunocompetent Mouse Model of Lassa Fever*. *J Infect Dis*, 2016. **213**(6): p. 934-8.
26. Jin, R., et al., *Population pharmacokinetics and pharmacodynamics of ribavirin in patients with chronic hepatitis C genotype 1 infection*. *AAPS J*, 2012. **14**(3): p. 571-80.
27. CMRC, *Maximum allowable total blood draw volumes*. 2006.
28. Laouenan, C., et al., *A Model-Based Illustrative Exploratory Approach to Optimize the Dosing of Peg-IFN/RBV in Cirrhotic Hepatitis C Patients Treated With Triple Therapy*. *CPT Pharmacometrics Syst Pharmacol*, 2015. **4**(1): p. e00008.
29. Wicha, S.G., W. Huisinga, and C. Kloft, *Translational Pharmacometric Evaluation of Typical Antibiotic Broad-Spectrum Combination Therapies Against Staphylococcus Aureus Exploiting In Vitro Information*. *CPT Pharmacometrics Syst Pharmacol*, 2017. **6**(8): p. 512-522.

For peer review only

STROBE Statement—Checklist of items that should be included in reports of *cohort studies*

| <b>Recommendation</b>        |    |                                                                                                                                                                                                                                                                                                                        |
|------------------------------|----|------------------------------------------------------------------------------------------------------------------------------------------------------------------------------------------------------------------------------------------------------------------------------------------------------------------------|
| <b>Title and abstract</b>    | V  | (a) Indicate the study's design with a commonly used term in the title or the abstract<br>(b) Provide in the abstract an informative and balanced summary of what was done and what was found                                                                                                                          |
| <b>Introduction</b>          |    |                                                                                                                                                                                                                                                                                                                        |
| Background/rationale         | V  | Explain the scientific background and rationale for the investigation being reported                                                                                                                                                                                                                                   |
| Objectives                   | V  | State specific objectives, including any prespecified hypotheses                                                                                                                                                                                                                                                       |
| <b>Methods</b>               |    |                                                                                                                                                                                                                                                                                                                        |
| Study design                 | V  | Present key elements of study design early in the paper                                                                                                                                                                                                                                                                |
| Setting                      | V  | Describe the setting, locations, and relevant dates, including periods of recruitment, exposure, follow-up, and data collection                                                                                                                                                                                        |
| Participants                 | V  | (a) Give the eligibility criteria, and the sources and methods of selection of participants. Describe methods of follow-up<br>(b) For matched studies, give matching criteria and number of exposed and unexposed                                                                                                      |
| Variables                    | V  | Clearly define all outcomes, exposures, predictors, potential confounders, and effect modifiers. Give diagnostic criteria, if applicable                                                                                                                                                                               |
| Data sources/<br>measurement | NA | For each variable of interest, give sources of data and details of methods of assessment (measurement). Describe comparability of assessment methods if there is more than one group                                                                                                                                   |
| Bias                         | V  | Describe any efforts to address potential sources of bias                                                                                                                                                                                                                                                              |
| Study size                   | V  | Explain how the study size was arrived at                                                                                                                                                                                                                                                                              |
| Quantitative variables       | V  | Explain how quantitative variables were handled in the analyses. If applicable, describe which groupings were chosen and why                                                                                                                                                                                           |
| Statistical methods          | V  | (a) Describe all statistical methods, including those used to control for confounding<br>(b) Describe any methods used to examine subgroups and interactions<br>(c) Explain how missing data were addressed<br>(d) If applicable, explain how loss to follow-up was addressed<br>(e) Describe any sensitivity analyses |
| <b>Other information</b>     |    |                                                                                                                                                                                                                                                                                                                        |
| Funding                      | 22 | Give the source of funding and the role of the funders for the present study and, if applicable, for the original study on which the present article is based                                                                                                                                                          |

\*Give information separately for exposed and unexposed groups.

**Note:** An Explanation and Elaboration article discusses each checklist item and gives methodological background and published examples of transparent reporting. The STROBE checklist is best used in conjunction with this article (freely available on the Web sites of PLoS Medicine at <http://www.plosmedicine.org/>, Annals of Internal Medicine at <http://www.annals.org/>, and Epidemiology at <http://www.epidem.com/>). Information on the STROBE Initiative is available at <http://www.strobe-statement.org>.

# BMJ Open

## A study protocol for a prospective observational study on the pharmacokinetic properties of the Irrua ribavirin regimen used in routine clinical practice in Lassa fever patients in Nigeria

|                               |                                                                                                                                                                                                                                                                                                                                                                                                                                                                                                                                                                                                                                                                                                                                                                                                                                                                                                                                                                                                                                                                                                                                                                                                                                                                                                                                                                                                                                                                                                                                                                                                                                                                                                                                                                                                                                                                                                                                                                                                                                                                                                                                                                                                                        |
|-------------------------------|------------------------------------------------------------------------------------------------------------------------------------------------------------------------------------------------------------------------------------------------------------------------------------------------------------------------------------------------------------------------------------------------------------------------------------------------------------------------------------------------------------------------------------------------------------------------------------------------------------------------------------------------------------------------------------------------------------------------------------------------------------------------------------------------------------------------------------------------------------------------------------------------------------------------------------------------------------------------------------------------------------------------------------------------------------------------------------------------------------------------------------------------------------------------------------------------------------------------------------------------------------------------------------------------------------------------------------------------------------------------------------------------------------------------------------------------------------------------------------------------------------------------------------------------------------------------------------------------------------------------------------------------------------------------------------------------------------------------------------------------------------------------------------------------------------------------------------------------------------------------------------------------------------------------------------------------------------------------------------------------------------------------------------------------------------------------------------------------------------------------------------------------------------------------------------------------------------------------|
| Journal:                      | <i>BMJ Open</i>                                                                                                                                                                                                                                                                                                                                                                                                                                                                                                                                                                                                                                                                                                                                                                                                                                                                                                                                                                                                                                                                                                                                                                                                                                                                                                                                                                                                                                                                                                                                                                                                                                                                                                                                                                                                                                                                                                                                                                                                                                                                                                                                                                                                        |
| Manuscript ID                 | bmjopen-2020-036936.R1                                                                                                                                                                                                                                                                                                                                                                                                                                                                                                                                                                                                                                                                                                                                                                                                                                                                                                                                                                                                                                                                                                                                                                                                                                                                                                                                                                                                                                                                                                                                                                                                                                                                                                                                                                                                                                                                                                                                                                                                                                                                                                                                                                                                 |
| Article Type:                 | Protocol                                                                                                                                                                                                                                                                                                                                                                                                                                                                                                                                                                                                                                                                                                                                                                                                                                                                                                                                                                                                                                                                                                                                                                                                                                                                                                                                                                                                                                                                                                                                                                                                                                                                                                                                                                                                                                                                                                                                                                                                                                                                                                                                                                                                               |
| Date Submitted by the Author: | 25-Feb-2020                                                                                                                                                                                                                                                                                                                                                                                                                                                                                                                                                                                                                                                                                                                                                                                                                                                                                                                                                                                                                                                                                                                                                                                                                                                                                                                                                                                                                                                                                                                                                                                                                                                                                                                                                                                                                                                                                                                                                                                                                                                                                                                                                                                                            |
| Complete List of Authors:     | <p>Erameh, Cyril; Irrua Specialist Teaching Hospital, Institute of Lassa Fever Research and Control; Irrua Specialist Teaching Hospital, Department of Medicine</p> <p>Edeawe, Osahogie ; Irrua Specialist Teaching Hospital, Institute of Lassa Fever Research and Control</p> <p>Akhideno, Peter; Irrua Specialist Teaching Hospital, Institute of Lassa Fever Research and Control; Irrua Specialist Teaching Hospital, Department of Medicine</p> <p>Eifediyi , Gloria; Irrua Specialist Teaching Hospital, Institute of Lassa Fever Research and Control</p> <p>Omansen, Till; Bernhard-Nocht-Institut für Tropenmedizin, Department of Tropical Medicine &amp; I. Department of Medicine University Medical Center Hamburg-Eppendorf</p> <p>Wagner, Christine; Bernhard-Nocht-Institut für Tropenmedizin, Department of Tropical Medicine &amp; I. Department of Medicine University Medical Center Hamburg-Eppendorf</p> <p>Sarpong, Francisca; Bernhard-Nocht-Institut für Tropenmedizin, Department of Tropical Medicine &amp; I. Department of Medicine University Medical Center Hamburg-Eppendorf</p> <p>Koch, Till; Bernhard-Nocht-Institut für Tropenmedizin, Department of Tropical Medicine &amp; I. Department of Medicine University Medical Center Hamburg-Eppendorf</p> <p>Wicha, Sebastian; University of Hamburg, Department of Clinical Pharmacology</p> <p>Kurth, Florian; Bernhard-Nocht-Institut für Tropenmedizin, Department of Tropical Medicine &amp; I. Department of Medicine University Medical Center Hamburg-Eppendorf; Charité Universitätsmedizin Berlin, Department of Infectious Diseases and Pulmonary Medicine</p> <p>Duraffour, Sophie; Bernhard-Nocht-Institut für Tropenmedizin, Department of Virology</p> <p>Oestereich, Lisa; Bernhard-Nocht-Institut für Tropenmedizin, Department of Virology</p> <p>Pahlmann, Meike; Bernhard-Nocht-Institut für Tropenmedizin, Department of Virology</p> <p>Okogbenin, Sylvanus; Irrua Specialist Teaching Hospital, Department of Obstetrics and Gynaecology; Irrua Specialist Teaching Hospital, Institute of Lassa Fever Research and Control</p> <p>Ogbaini-Emovon, Ephraim; Irrua Specialist Teaching Hospital, Institute</p> |

|                                      |                                                                                                                                                                                                                                                                                                                                                                                                                                                                                           |
|--------------------------------------|-------------------------------------------------------------------------------------------------------------------------------------------------------------------------------------------------------------------------------------------------------------------------------------------------------------------------------------------------------------------------------------------------------------------------------------------------------------------------------------------|
|                                      | of Lassa Fever Research and Control<br>Günther, Stephan; Bernhard-Nocht-Institut für Tropenmedizin,<br>Department of Virology<br>Ramharter, Michael; Bernhard-Nocht-Institut für Tropenmedizin,<br>Department of Tropical Medicine & I. Department of Medicine University<br>Medical Center Hamburg-Eppendorf<br>Groger, Mirjam; Bernhard-Nocht-Institut für Tropenmedizin, Department<br>of Tropical Medicine & I. Department of Medicine University Medical<br>Center Hamburg-Eppendorf |
| <b>Primary Subject<br/>Heading</b> : | Infectious diseases                                                                                                                                                                                                                                                                                                                                                                                                                                                                       |
| Secondary Subject Heading:           | Pharmacology and therapeutics                                                                                                                                                                                                                                                                                                                                                                                                                                                             |
| Keywords:                            | INFECTIOUS DISEASES, CLINICAL PHARMACOLOGY, VIROLOGY                                                                                                                                                                                                                                                                                                                                                                                                                                      |
|                                      |                                                                                                                                                                                                                                                                                                                                                                                                                                                                                           |

SCHOLARONE™  
Manuscripts



I, the Submitting Author has the right to grant and does grant on behalf of all authors of the Work (as defined in the below author licence), an exclusive licence and/or a non-exclusive licence for contributions from authors who are: i) UK Crown employees; ii) where BMJ has agreed a CC-BY licence shall apply, and/or iii) in accordance with the terms applicable for US Federal Government officers or employees acting as part of their official duties; on a worldwide, perpetual, irrevocable, royalty-free basis to BMJ Publishing Group Ltd ("BMJ") its licensees and where the relevant Journal is co-owned by BMJ to the co-owners of the Journal, to publish the Work in this journal and any other BMJ products and to exploit all rights, as set out in our [licence](#).

The Submitting Author accepts and understands that any supply made under these terms is made by BMJ to the Submitting Author unless you are acting as an employee on behalf of your employer or a postgraduate student of an affiliated institution which is paying any applicable article publishing charge ("APC") for Open Access articles. Where the Submitting Author wishes to make the Work available on an Open Access basis (and intends to pay the relevant APC), the terms of reuse of such Open Access shall be governed by a Creative Commons licence – details of these licences and which [Creative Commons](#) licence will apply to this Work are set out in our licence referred to above.

Other than as permitted in any relevant BMJ Author's Self Archiving Policies, I confirm this Work has not been accepted for publication elsewhere, is not being considered for publication elsewhere and does not duplicate material already published. I confirm all authors consent to publication of this Work and authorise the granting of this licence.

1  
2  
3  
4  
5  
6  
7  
8  
9  
10  
11  
12  
13  
14  
15  
16  
17  
18  
19  
20  
21  
22  
23  
24  
25  
26  
27  
28  
29  
30  
31  
32  
33  
34  
35  
36  
37  
38  
39  
40  
41  
42  
43  
44  
45  
46  
47  
48  
49  
50  
51  
52  
53  
54  
55  
56  
57  
58  
59  
60

# A study protocol for a prospective observational study on the pharmacokinetic properties of the Irrua ribavirin regimen used in routine clinical practice in Lassa fever patients in Nigeria

## *Acronym: PAIRR (Pharmacologic Analysis of the Irrua Ribavirin Regimen)*

### Authors:

Cyril Erameh<sup>1,2</sup>, Osahogie Edeawe<sup>1</sup>, Peter Akhiden<sup>1,2</sup>, Gloria Eifediyi<sup>1</sup>, Till Omansen<sup>3</sup>, Christine Wagner<sup>3</sup>, Francisca Sarpong<sup>3</sup>, Till Koch<sup>3</sup>, Sebastian Wicha<sup>4</sup>, Florian Kurth<sup>3,5</sup>, Sophie Duraffour<sup>6</sup>, Lisa Oestereich<sup>6</sup>, Meike Pahlmann<sup>6</sup>, Sylvanus Okogbenin<sup>1,7</sup>, Ephraim Ogbaini-Emovon<sup>1</sup>, Stephan Günther<sup>6</sup>, Michael Ramharter<sup>3</sup>, Mirjam Groger<sup>3</sup>

1 Institute of Lassa Fever Research and Control, Irrua Specialist Teaching Hospital, Irrua, Nigeria

2 Department of Medicine, Irrua Specialist Teaching Hospital, Irrua, Nigeria

3 Department of Tropical Medicine, Bernhard Nocht Institute for Tropical Medicine & I. Department of Medicine University Medical Center Hamburg-Eppendorf, Hamburg, Germany

4 Department of Clinical Pharmacology, Institute of Pharmacology, University of Hamburg, Hamburg, Germany

5 Department of Infectious Diseases and Pulmonary Medicine, Charité Universitätsmedizin Berlin, Berlin, Germany

6 Department of Virology, Bernhard Nocht Institute for Tropical Medicine, Hamburg, Germany

7 Department of Obstetrics and Gynecology, Irrua Specialist Teaching Hospital, Irrua, Nigeria

### **Corresponding Author:**

Mirjam Groger MD, PhD

Department of Tropical Medicine

Bernhard-Nocht-Institute for Tropical Medicine &

I. Dep. of Medicine, University Medical Center Hamburg-Eppendorf

groger@bnitm.de

Version: 03 06DEC2019

## Abstract

### Introduction:

Lassa fever (LF) is a severe and often fatal systemic disease in humans and affects a large number of countries in West Africa. Treatment options are limited to supportive care and the broad-spectrum antiviral agent ribavirin. However, evidence for ribavirin efficacy in LF patients is poor and pharmacokinetic (PK) data are not available.

Irrua Specialist Teaching Hospital (ISTH), developed an intravenous ribavirin regimen different to the WHO recommendation. Apart from a lower total daily dose the drug is usually administered once per day which reduces the exposure of personnel to LF patients. The aim of this study is to characterize the PK of the Irrua Ribavirin Regimen.

### Methods and analysis:

This prospective, observational clinical study will assess PK properties of the Irrua Ribavirin Regimen on routinely ribavirin treated LF patients at ISTH, a referral hospital serving 19 local governmental areas in a LF endemic zone in Nigeria. Participants will be adults with PCR-confirmed LF. The primary objective is to describe classical PK parameters for ribavirin (maximum plasma drug concentration ( $C_{max}$ ), Time to maximum plasma drug concentration ( $T_{max}$ ), area under the plasma drug concentration versus time curve (AUC), half-life time  $T_{1/2}$ , volume of distribution ( $V_d$ )). Blood samples will be collected at 0.5, 1, 3, 5, 8, 12 and 24 hours after doses on day 1, day 4 and day 10 of ribavirin treatment. Plasma ribavirin plasma concentrations will be determined using liquid chromatography coupled to tandem mass spectrometry (LC-MS/MS).

### Ethics and dissemination

The study will be conducted in compliance with the protocol, the Declaration of Helsinki, the ICH-GCP guideline and the Nigerian National Code for Health Research Ethics. The protocol has received approval by the Health Research Ethics Committee of ISTH.

Results will be made available to LF survivors, their caregivers, the funders, LF research society and other researchers.

### Registration details

The study will be registered at [clinicaltrials.gov](http://clinicaltrials.gov) before inclusion of first patient

### Summary, strengths and weaknesses of this study

- PAIRR will provide pharmacokinetic data on intravenous ribavirin treatment, the current standard treatment in patients with LF.
- The results of this study will provide the basis for future dose optimization studies with the ultimate goal of improving patient care.
- A limitation of the study is, that due to ethical reasons only patients will be included who are able to give written or oral informed consent themselves. Therefore, unconscious patients or patients with impaired consciousness will not be included, which will result in a study population not fully representative of unselected LF-patients.

## 1 List of abbreviations

|                    |                                                            |
|--------------------|------------------------------------------------------------|
| ALT                | Alanine aminotransferase                                   |
| AST                | Aspartate aminotransferase                                 |
| AUC                | Area under the plasma drug concentration versus time curve |
| BNITM              | Bernhard Nocht Institute for Tropical Medicine             |
| BUN                | Blood urea nitrogen                                        |
| C <sub>max</sub>   | Maximum plasma drug concentration                          |
| CRA                | Clinical research associate                                |
| CRF                | Case report form                                           |
| eCRF               | electronic case report form                                |
| EC                 | European Commission                                        |
| GCP                | Good Clinical Practice                                     |
| GOT                | Aspartate aminotransferase                                 |
| GPT                | Alanine aminotransferase                                   |
| ILFRC              | Institute of Lassa fever Research and Control              |
| ISTH               | Irrua Specialist Teaching Hospital                         |
| LASV               | Lassa virus                                                |
| LF                 | Lassa Fever                                                |
| PK                 | Pharmacokinetics                                           |
| PD                 | Pharmacodynamics                                           |
| PCR                | Polymerase chain reaction                                  |
| PI                 | Principal investigator                                     |
| QC                 | Quality control                                            |
| RT-PCR             | Reverse-transcription polymerase chain reaction            |
| TCID <sub>50</sub> | 50% Tissue Culture Infection Dose                          |
| T <sub>max</sub>   | Time to maximum plasma drug concentration                  |
| T <sub>1/2</sub>   | Half-life time                                             |
| V <sub>d</sub>     | Volume of distribution                                     |
| WHO                | World Health Organization                                  |

## Introduction

### Background

Lassa fever (LF) is an acute febrile illness associated with bleeding, organ failure, and shock caused by the Lassa virus (LASV) (arenavirus) [1]. The virus reservoir is the commensal rodent *Mastomys natalensis* [2]. LASV is also transmitted from human to human and may cause nosocomial outbreaks with case fatality rates of up to 60% [3].

A large number of low and middle-income countries (LMICs) of the West African region is affected by LF: Ghana, Guinea, Mali, Benin, Liberia, Sierra Leone, Togo and Nigeria. The proportion of hospital admissions due to LF may reach 15% in endemic zones [4-6]. Fatal cases are associated with high viremia, liver damage, renal failure, bleeding, encephalopathy, and a shock-like syndrome [4, 7-10]. Health systems in areas where the disease is endemic but also in developed countries are overwhelmed due to the lack of LF diagnostics, the risk of nosocomial transmission, and the limited treatment options [11].

Following the Ebola virus disease crisis, the World Health Organization (WHO) has initiated the research and development (R&D) Blueprint as a global strategy and preparedness plan to ensure that targeted R&D brings medical technologies to patients during epidemics [12]. The WHO and international experts have agreed on a list of priority diseases for urgent R&D which also includes LF. The WHO recognises that there is insufficient research for epidemic-prone diseases mainly affecting LMICs. The research needs of LMICs span from “proof of principle/preclinical studies to the implementation and regulation of clinical studies, innovative strategies for the production of health technologies, development of key enabling capacities, such as pathogenesis studies of the priority pathogens and surveillance methodologies, and regulatory science needed to enhance regulatory preparedness” [12].

In Nigeria, LF case management centres are only operational in three out of 36 states. LF outbreaks occur annually but have recently started becoming a major threat. At the beginning of 2018 Nigeria experienced the largest outbreak of LF ever with hundreds of recorded clinical cases [13].

### Lassa fever in Irrua

The Irrua Specialist Teaching Hospital in Irrua, Edo State, Nigeria (ISTH) is located in a hyperendemic area for LF [10, 14, 15]. Molecular LF diagnostics is performed on a daily basis. The laboratory has also been instrumental in the diagnosis of LF outbreaks in several other

BNITM

Department of Tropical Medicine



states of the country. There has been a long-lasting institutional collaboration between Bernhard Nocht Institute of tropical Medicine (BNITM) and ISTH during the past decade with high level of capacity building in laboratory and clinical research, including setting up of a training and research center. ISTH and BNITM are partners in various networks and projects, such as European and Developing Countries Clinical Trials Partnership-funded projects and the European Commission (EC)-funded European Mobile Laboratory project.

### Literature review

The only drug with a proven therapeutic effect in humans with LF is the broad-spectrum nucleoside analogue ribavirin. Ribavirin reduces replication of LASV at concentrations between 10 µg/ml and 50 µg/ml in cell culture, and shows efficacy in LASV-infected monkeys [16-19]. Initiation of treatment within 5 days after inoculation protected all monkeys, while initiation of treatment at day 7 conferred only partial protection. In treated animals, viremia developed more slowly and peaked at lower titres than in untreated controls [16, 17]. The mode of action of ribavirin against LASV is not clear. Recently, it has been shown with other RNA viruses that ribavirin can be incorporated into the RNA strand leading to lethal mutagenesis of progeny genomes [20, 21]. It is assumed that, if the mutation rate is too high, the genetic information cannot be maintained and the virus population goes into extinction. This process is called lethal mutagenesis or error catastrophe.

Evidence for the currently recommended ribavirin treatment (30 mg/kg loading dose followed by 15 mg/kg every 6 hours for 4 days followed by 7.5 mg/kg every 8 hours for 6 days) adds up to one clinical study by McCormick et al. published in 1986 [22]. In patients with a high risk of fatal outcome (aspartate aminotransferase (AST/GOT) values  $\geq 150$  U/l), initiation of treatment within 6 days after onset of fever reduced the case fatality rate from 55% to 5% [23]. Similarly, in patients with high viremia ( $\geq 10^{3.6}$  TCID<sub>50</sub>/ml (50% Tissue Culture Infection Dose per millilitre)), treatment reduced the case fatality rate from 76% to 9%. Even if treatment was initiated at day 7 or later, the case fatality could be reduced in these groups to 26% and 47%, respectively. No major differences were seen between oral and intravenous treatment. When, however, reviewing the publication thoroughly, several deficits become apparent. Research participants had not been randomized to either control or treatment group but a historic cohort of untreated patients was taken as control group. The treatment group was further separated into several subgroups with different treatment options (oral ribavirin, intravenous ribavirin, convalescent plasma) and different time points of treatment (within 6 days after onset of

1  
2  
3  
4  
5 symptoms or later). The authors yet did not describe how patients had been allocated to the  
6 different subgroups and whether allocation had happened before or after inclusion in the study.  
7 There was, furthermore, a questionable deviation from the planned research design as  
8 subgroups were merged together after the end of the study. Additionally, total participant  
9 numbers in treatment and control groups remain unclear. Still, despite these serious biases this  
10 study is taken as reference for LF treatment since more than 30 years [23]. The dose used in the  
11 1986 study is recommended by WHO for treatment of LF [24]. However, no data exist about  
12 the rationale for this dose, the achieved ribavirin blood levels under this dose, or the efficacy and  
13 pharmacokinetics (PK) of other dosing schemes. PK assessments of ribavirin are only available  
14 for different dosing regimens used for hepatitis C [25]. Clinical experience and expert opinion  
15 in the endemic countries agree with the results but scientific evidence is still largely lacking  
16 behind.

17  
18  
19 Based on the highest case load of LF patients in any institution in Nigeria, ISTH developed a  
20 ribavirin regimen different from the WHO recommendation which is here referred to as “Irrua  
21 regimen” or “Irrua ribavirin treatment regimen” [26]. Apart from a higher loading dose and a  
22 lower total daily dose administered during the course of the Irrua regimen, the drug is usually  
23 administered once per day.  
24  
25

### 26 Rationale for this project

27  
28 LF is a dangerous infection with a high lethality rate. During the past years, cases of LASV  
29 infection increased markedly and more evidence on an efficacious therapy of this disease is  
30 direly needed. The standard treatment for LF patients is ribavirin, as the study by McCormick  
31 et.al demonstrated efficacy of ribavirin in reducing the fatality rate of LF; Ribavirin also  
32 increases survival in in-vivo animal models of LASV infection [27]. Ribavirin at ISTH is used  
33 at a dose that deviates from the WHO recommendation. From clinical experience during the  
34 last decade, the standard Irrua regimen of ribavirin is postulated to be efficacious. Yet it is  
35 aneasier to use and a safer alternative to the McCormick regimen, because the exposure of  
36 personnel to LF diseased patients is reduced. However, to our knowledge, the PK properties of  
37 the Irrua ribavirin regimen have never been described. It is not known if this dose reaches blood  
38 levels that would be sufficient to exert an antiviral effect in the patients. Therefore, in this  
39 prospective observational study we aim to obtain evidence on ribavirin PKs in patients who  
40 receive the Irrua ribavirin regimen as standard of care at ISTH. The Irrua regimen entails the  
41 following ribavirin dosages for intravenous use:  
42  
43  
44  
45  
46  
47  
48  
49  
50  
51  
52  
53  
54  
55  
56  
57  
58  
59  
60

- 1) Start dose (day 1): 100 mg/kg; If this start dose is  $> 6g$  then  $2/3$  of the dose will be given straight away and the remaining  $1/3$  is administered 8 hours later. If this dose is  $< 6g$  than the entire dose will be given at once.
- 2) Days 2-5: 25mg/kg/day once daily
- 3) Days 6-10: 12.5mg/kg/day once daily

Data derived from this observational study will serve as basis for further clinical studies studying the efficacy and safety of ribavirin and provide the possibility to compare the Irrua regimen with alternative treatment candidates such as favipiravir and possible combination regimen of favipiravir and ribavirin. This will serve as basis for further dose optimization of ribavirin helping to further ameliorate the management of LF patients in the endemic regions. This work is thus an important cornerstone for the development and implementation of a treatment standard and evidence-based treatment recommendations for LF.

### Primary research question

What are the PK properties of ribavirin administered as per the Irrua ribavirin treatment regimen to LF patients?

### Study objectives

#### General objective

The aim of this study is to describe the PK properties of ribavirin when administered in routine care under the Irrua dosing regimen in patients with polymerase chain reaction (PCR) confirmed LF, to generate an evidence base for the use of the said regimen and to inform further studies regarding the efficacy of ribavirin, possibly in comparison and combination to other anti-viral agents.

#### Specific objectives

##### Primary objective:

1. Describe the classical PK parameters for ribavirin (maximum plasma drug concentration ( $C_{max}$ ), Time to maximum plasma drug concentration ( $T_{max}$ ), area under the plasma drug concentration versus time curve (AUC), half-life time ( $T_{1/2}$ ), volume of distribution ( $V_d$ )) in LF patients treated with the Irrua ribavirin regimen.

Secondary objectives:

2. Examine the clinical, hematological, biochemical parameters of the patients and correlate them with ribavirin blood levels.
3. Study the kinetics of LASV loads in blood by reverse-transcription polymerase chain reaction (RT-PCR) and describe the association of drug exposure with the viral kinetics.
4. Determine LASV sequences and sequence changes during the treatment that might point towards resistant mutants or to increased error rate induced by the nucleoside analogue ribavirin

## Methods and Analysis

### Study design

A prospective, observational and descriptive clinical study will be conducted to assess the PK properties of the Irrua ribavirin regimen on routinely ribavirin treated LF patients at the Lassa fever isolation ward of ISTH that will be included following provision of written informed consent.

### Primary endpoint

PK parameters of the routine care ribavirin regimen at ISTH

### Secondary endpoints

- a. Clinical, hematological and biochemical safety and tolerability of the routine Irrua regimen
- b. Viral kinetics in patients routinely treated with the Irrua ribavirin regimen
- c. LASV genome changes under the Irrua ribavirin regimen

### Study site

The Lassa Unit of the ISTH in Edo State is one of the three operating LF case management centers with an adjacent laboratory that conducts PCR testing [13]. It is a referral hospital serving 19 local governmental areas in an LF endemic zone and one of the few hospitals in West Africa that feature facilities for diagnosis, research, and treatment of LF. The Institute of Lassa fever Research and Control (ILFRC) at ISTH performs molecular LF diagnostics on a daily basis since 2008. A LF clinic for appropriate patient management was commissioned in 2010. Up to 2,000 suspected patients are tested each year of which 100-200 test positive for LASV. Most of them are treated at the ISTH Lassa ward. BNITM and ISTH established a

BNITM

Department of Tropical Medicine



Training and Clinical Trial Center that features laboratory facilities for Good Clinical Laboratory Practice (GCLP) conform processing of samples from clinical studies, including real-time RT-PCR for virus load monitoring, serology, and sequencing. These facilities shall be further upgraded and used for this study.

## Study population and selection criteria

### Study population

The study population consists of LF patients presented and routinely treated for LF on the Lassa isolation ward of ISTH which fit the below detailed selection criteria of the study.

### Sample size

A sample size of 20 evaluable patients as defined by sponsor is proposed. The sample size and sampling design was evaluated using stochastic clinical trial simulation and estimation (SSE) in NONMEM® (v. 7.4, ICON development solutions, Hanover, USA). In the SSE approach, population PK parameters including their intra- and interindividual variability of a published two compartment model [28] were used and 500 clinical trials with the proposed sampling design (0.5, 1, 3, 5, 8, 12 and 24 h after the first, fourth and tenth dose) were simulated using the Irrua dosing regimen. The population PK parameters were re-estimated and compared against the known values from the simulation step.

For PK the proposed sampling design will allow the determination of the structural PK parameters with low absolute relative bias (< 2.4%) and low imprecision (<17%). The design also supports adequate estimation of the PK variability components (inter-individual variability: absolute relative bias <6.8%, imprecision: <33.2%; intra-individual variability: absolute relative bias <-0.3%, imprecision: 2.5%).

To evaluate the potential link between PK and PD (pharmacodynamic) (viral kinetics) in the exploratory analysis, the model used in the SSE was extended by an assumed PD component (ribavirin stimulating a first-order decay of viral load). Daily sampling (where coinciding with the safety assessment, otherwise every other day as outlined in the study flow chart) of viral load will allow to detect even weak exposure response relations. For example, a ribavirin-induced decline in viral load with a viral elimination half-life of 480 h compared to no effect assuming high interpatient variability in PD response of 70% and a PD measurement error of

BNITM

Department of Tropical Medicine



30% will be detectable at a power of 99 % with adequate accuracy (absolute relative bias <17.3 %) and imprecision (< 33.2%).

## Selection criteria

### Inclusion criteria

- Age  $\geq$  18 years
- LF confirmed by RT-PCR
- Written informed consent
- Anticipated treatment with intravenous ribavirin

### Exclusion criteria

- Inability to give consent (e.g. unconscious patients/ cognitively impaired patients)
- Critical illness (based on investigator's clinical evaluation)
- Severe malnutrition
- Hemodialysis
- History of hemophilia / bleeding disorder
- Hematocrit <30 %
- History of hemoglobinopathies (i.e., sickle-cell anaemia or thalassemia major)
- Known intolerance to ribavirin
- Known pregnancy (as assessed during routine care through patient's history, physical and ultrasound examination and/or pregnancy test)
- Women who plan to get pregnant within the upcoming 3 months
- Patients who already received ribavirin within the last 7 days
- Concomitant administration of Didanosine and other contraindicated concomitant medication

## Enrolment

Recruitment of patients and inclusion in the study will be performed at the study centre during the consultation on Day 0 by an investigator who is not involved in the standard of care treatment of the patients. Vulnerable patients such as pregnant women and minors will be excluded from the research because they should not be exposed to the additional burden of drawing more blood than necessary. Cognitively impaired patients will be excluded because they cannot make an informed consent about the study participation. Furthermore, children and

BNITM

Department of Tropical Medicine



pregnant women do not receive ribavirin intravenously but orally and are therefore not eligible for enrolment. Patients who fulfill selection criteria are eligible and will be proposed to participate. The patients will be informed in writing and orally about the study and they will have time to address possible questions to the investigator. They will have time to consider their participation in the study. Inclusion will follow the provision of voluntary written informed consent of the patient or the impartial witness in case of illiteracy.

A unique identifier (unique participant number) will be allocated and demographic baseline data including date of birth, sex, weight and height will be collected and documented in a study specific electronic case report form (eCRF). Patients then continue the routine standard care. The enrolment period corresponds to the period of hospitalization at the Lassa isolation ward but is limited to 11 days.

### Study limitations

This is an observational study and no interference with medical treatment will take place.

Therefore, also no comparison with different treatments or treatment regimens (e.g. the WHO recommended ribavirin regimen), will be performed.

The potential bias in this study include

- a. missing samples or insufficient sample volume to perform laboratory tests
- b. early withdrawal due to death, medical condition contraindicating the collection of blood or premature termination of intravenous ribavirin administration due to clinical improvement and switch to oral treatment based on physicians' discretion
- c. inclusion of non-severe LF cases, which may not be directly representative of patients with severe organ failure

### Study duration

The enrolment period corresponds to the length of the participant's stay at the study site until they are discharged but is limited to a duration of 11 days. The common duration for LF treatment is 10 days. The study itself is intended to start in January 2020 and it is supposed to end in September 2020.

During the course of a research project, new information may become available that impacts the research. If this happens, the investigator will tell the participants about it and discuss with them whether they want to continue in the research project. If they decide to withdraw, the

investigator will make arrangements for their regular health care to continue. If they decide to continue in the study, they will be asked to sign an updated consent form.

Also, on receiving new information, the investigator might consider it to be in the participants' best interests to withdraw them from the research project. If this happens, he/ she will explain the reasons and arrange for their regular health care to continue

## Study procedures

The study procedures are applied by designated trained staff of ISTH, BNITM, University of Hamburg, and Ambrose Alli University (AAU, Ekpoma, Nigeria) within their usual work scope since this is an observational study and the research team is not involved in decisions regarding the participant's treatment. This study's personnel will receive a reasonable and adequate financial compensation for the time and risk/hazards involved in this research.

## Data acquisition

Baseline data (age, sex, medical history, concomitant medication, concomitant treatment, pregnancy status, weight, height, physical examination) will be collected on study specific eCRFs. Body temperature will be measured and signs and symptoms of LF (such as fatigue, diarrhea, nausea, vomiting, abdominal pain, bleeding, chest pain, hearing problems and decreased vision) will be assessed daily (during study visits indicated in the study flow) and documented in the eCRF.

## Blood sampling and analysis

Blood will be taken by laboratory staff of ISTH. Appropriate training in phlebotomy, with the aim to reduce the burden and risk on participants will be provided to all personnel involved prior to the commencement of the trial. A peripheral venous catheter will be inserted on days where more than two blood draws are necessary. Before each blood withdrawal the catheter will be rinsed and the first 3 ml will be discarded to ensure adequate quality of the blood. At the end of the study, leftover material (for example heparin plasma which is leftover after all biochemistry analyses have been performed), will be stored at ISTH and BNITM.

- 4 ml EDTA blood for PK and RT-PCR analyses
- 3 ml of EDTA blood for hematology analyses (and RT-PCR analyses in case of routine hematology blood draw)
- 3 ml of heparin blood for biochemistry analyses
- 2 ml EDTA blood for RT-PCR analyses and serology

**BNITM**

Department of Tropical Medicine



- 2 ml EDTA blood for PK analyses

In total approximately 160 ml blood (corresponding to approximately 11 tablespoons of blood) will be withdrawn within the scope of the study whereof 42 ml (approx. 3 tablespoons) are part of the routine practice and 117 ml (approx. 8 tablespoons) are additional withdrawals due to the study participation. This total amount of blood which will be withdrawn does not exceed the maximum allowable total blood draw volumes for clinical research studies [29].

**Bioanalysis / Ribavirin PK**

Blood samples will be collected at 0.5, 1, 3, 5, 8, 12 and 24 hours after the doses on day 1, day 4 and day 10 of ribavirin treatment. Additionally, it will be collected during screening before the first dose of ribavirin. Blood samples will be centrifuged and the plasma supernatant will be frozen at  $-80^{\circ}\text{C}$  within 2 h after blood sampling. Plasma samples will be shipped frozen to BNITM for viral heat inactivation using a validated protocol [30, 31]. The samples will then be shipped to the bioanalysis site (Dept. of Clinical Pharmacy, Institute of Pharmacy, University of Hamburg, Germany). There, ribavirin plasma concentrations will be determined using liquid chromatography coupled to tandem mass spectrometry.

**RT-PCR analysis / Virological response**

EDTA blood will be sampled at recruitment, 24 hours and then at study visits outlined in the study flow chart until the end of treatment. Blood will be processed directly to analyse viral load by qRT-PCR. Samples will be aliquoted, frozen and securely stored at ISTH until transported to BNITM at certain time points.

Assays such as the enzyme-linked immunosorbent assays (ELISA) and/or immunofluorescence assays will be used to determine LASV specific IgM and IgG, as well as further IgG sub-classification, and to monitor the development of LASV specific antibodies in blood. Viral growth, isolation of Lassa virus in cell culture, virus sequencing and unbiased metagenomic sequencing will be used to study the longitudinal impact of drug treatment (ribavirin) on Lassa virus genomes. Sequence analysis shall be done at both ISTH and BNITM.

Laboratory analyses requiring the use of a Biosafety Level 4 laboratory (virus isolation) will be performed at the BNITM. Aliquots of samples will be shipped to BNITM according to UN2814 regulations [32].

**Hematological and biochemical safety and tolerability**

Blood will be sampled at baseline and then every second day until the tenth day of dosing at timepoints indicated in the study time schedule below. Full blood count and biochemistry will

1  
2  
3  
4  
5 be performed. Biochemistry analysis will include creatinine, creatine kinase, uric acid, blood  
6 urea nitrogen (BUN), alanine aminotransferase (ALT/GPT), aspartate aminotransferase  
7 (AST/GOT), bilirubin,  $\gamma$ GT, amylase and serum electrolytes. Biochemical and hematological  
8 assays will be conducted by ISTH and AAU staff during the course of routine safety sampling.  
9

## 12 Participant safety

13  
14  
15 This is a non-interventional observational study with minimal study related risk for the  
16 participant. The biological risk in this study is limited to repeated draws of small amounts of  
17 venous blood. This risk encompasses local pain at the venepuncture site, the risk for the  
18 development of local haemorrhage due to the blood sampling and bleeding. However, even in  
19 haemorrhagic participants bleeding can be stopped by mechanical compression.  
20  
21

22 Insertion of IV catheters for repeat blood draws is associated with risk of local and systemic  
23 infection as in routine procedure. No further biological risks are associated with this  
24 observational study for the participants. The designated study monitor will monitor the data to  
25 ensure data reliability and patients' safety. An independent medical monitor will monitor the  
26 participants' safety data.  
27  
28

29 Before the start of the study, the personnel will receive trainings in Good Clinical Practice  
30 (GCP), research ethics, study procedures and phlebotomy. The study team will consist of  
31 personnel which is trained in supportive care of LF patients.  
32  
33

## 34 Adverse events (AE) associated with phlebotomy

### 35 General definition of AE

36 An AE is any untoward medical occurrence in a patient or clinical investigation subject  
37 administered a pharmaceutical product and which does not necessarily have a causal  
38 relationship with this treatment. An AE can therefore be any unfavourable and unintended sign  
39 (including an abnormal laboratory finding), symptom, or disease temporally associated with the  
40 use of a medicinal (investigational) product, whether or not related to the medicinal  
41 (investigational) product.  
42  
43

### 44 Assessment of adverse events in this study

45 In this study only adverse events which are unfavourable and/or unintended signs, symptoms  
46 temporally associated with phlebotomy will be captured. This will be recorded in the  
47 participant case report form.  
48  
49  
50  
51  
52  
53  
54  
55  
56  
57  
58  
59  
60

1  
2  
3  
4  
5 Clinical signs typical of LF will not be considered AEs unless the healthcare personnel  
6 considers these events as exceptional due to their evolution, their seriousness, or another factor  
7 related to these events.  
8  
9

## 11 Severity

12  
13 The investigator will assess the severity/intensity of the adverse events using the following  
14 guidelines:  
15

- 16 • Mild: awareness of sign or symptom, but easily tolerated
- 17 • Moderate: enough discomfort to cause interference with usual activity
- 18 • Severe: incapacitating with inability to work or do usual activity
- 19 • Life-threatening

## 26 Action taken

- 27 • Patient withdrawn from study
- 28 • Concomitant medication required
- 29 • Hospitalization required or prolonged
- 30 • Other

## 36 Outcome

37  
38 The investigator will follow-up the adverse event until resolution or until no further medically  
39 relevant information can be expected. Adverse event outcome will be classified as follows:  
40

- 41 • Resolved
- 42 • Resolved with sequelae
- 43 • Continuing
- 44 • Death



## 2 Time schedule of enrolment and assessments for participants

| STUDY EXAM                                       | Screening | First dose, day 1 | 0.5 hours post 1 <sup>st</sup> dose | 1 hour post 1 <sup>st</sup> dose | 3 hours post 1 <sup>st</sup> dose | 5 hours post 1 <sup>st</sup> dose | 8 hours post 1 <sup>st</sup> dose and administration of 2 <sup>nd</sup> dose of day 1 | 12 hours post 1 <sup>st</sup> dose | 24 hours post 1 <sup>st</sup> dose | Second day of dosing | Third day of dosing | Fourth day of dosing | 0.5 hours post dose day 4 | 1 hour post dose day 4 | 3 hours post dose day 4 | 5 hours post dose day 4 | 8 hours post dose day 4 |
|--------------------------------------------------|-----------|-------------------|-------------------------------------|----------------------------------|-----------------------------------|-----------------------------------|---------------------------------------------------------------------------------------|------------------------------------|------------------------------------|----------------------|---------------------|----------------------|---------------------------|------------------------|-------------------------|-------------------------|-------------------------|
| Visit-ID                                         | D0        |                   | D1_h 0.5                            | D1_h1                            | D1_h3                             | D1_h5                             | D1_h8                                                                                 | D1_h1 2                            | D1_h2 4                            |                      | D3                  |                      | D4_h0. 5                  | D4_h 1                 | D4_h 3                  | D4_h 5                  | D4_h 8                  |
| Written informed consent                         | X         |                   |                                     |                                  |                                   |                                   |                                                                                       |                                    |                                    |                      |                     |                      |                           |                        |                         |                         |                         |
| Medical history                                  | X         |                   |                                     |                                  |                                   |                                   |                                                                                       |                                    |                                    |                      |                     |                      |                           |                        |                         |                         |                         |
| Previous medication                              | X         |                   |                                     |                                  |                                   |                                   |                                                                                       |                                    |                                    |                      |                     |                      |                           |                        |                         |                         |                         |
| Baseline characteristics                         | X         |                   |                                     |                                  |                                   |                                   |                                                                                       |                                    |                                    |                      |                     |                      |                           |                        |                         |                         |                         |
| Body temperature                                 | X         |                   | X                                   |                                  |                                   |                                   |                                                                                       |                                    | X                                  |                      | X                   |                      | X                         |                        |                         |                         |                         |
| Signs and symptoms                               | X         |                   | X                                   |                                  |                                   |                                   |                                                                                       |                                    | X                                  |                      | X                   |                      | X                         |                        |                         |                         |                         |
| Physical examination                             | X         | X                 |                                     |                                  |                                   |                                   |                                                                                       |                                    |                                    |                      |                     |                      |                           |                        |                         |                         |                         |
| In/Exclusion criteria                            | X         |                   |                                     |                                  |                                   |                                   |                                                                                       |                                    |                                    |                      |                     |                      |                           |                        |                         |                         |                         |
| Blood sample for hematology/biochemistry         | X         |                   |                                     |                                  |                                   |                                   |                                                                                       |                                    |                                    |                      | X                   |                      |                           |                        |                         |                         |                         |
| Blood sample for PK/PD                           | X         |                   | X                                   | X                                | X                                 | X                                 | X                                                                                     | X                                  | X                                  |                      |                     |                      | X                         | X                      | X                       | X                       | X                       |
| Blood sample for RT-PCR and virological analyses | X         |                   |                                     |                                  |                                   |                                   |                                                                                       |                                    | X                                  |                      | X                   |                      | X                         |                        |                         |                         |                         |
| Adverse events associated with phlebotomy        |           |                   | X                                   |                                  |                                   |                                   |                                                                                       |                                    | X                                  |                      | X                   |                      | X                         |                        |                         |                         |                         |

BNITM  
Department of Tropical Medicine



| STUDY EXAM                                       | 12 hours post dose day 4 | 24 hours post dose day 4 | Fifth day of dosing | Sixth day of dosing | Seventh day of dosing | Eighth day of dosing | Ninth day of dosing | Tenth day of dosing | 0.5 hours post dose day 10 | 1 hour post dose day 10 | 3 hours post dose day 10 | 5 hours post dose day 10 | 8 hours post dose day 10 | 12 hours post dose day 10 | 24 hours post dose day 10 |
|--------------------------------------------------|--------------------------|--------------------------|---------------------|---------------------|-----------------------|----------------------|---------------------|---------------------|----------------------------|-------------------------|--------------------------|--------------------------|--------------------------|---------------------------|---------------------------|
| Visit-ID                                         | D4_h12                   | D4_h24                   | D5                  | D6                  | D7                    | D8                   | D9                  | D10                 | D10_h0.5                   | D10_h1                  | D10_h3                   | D10_h5                   | D10_h8                   | D10_h12                   | D10_h24                   |
| Written informed consent                         |                          |                          |                     |                     |                       |                      |                     |                     |                            |                         |                          |                          |                          |                           |                           |
| Medical history                                  |                          |                          |                     |                     |                       |                      |                     |                     |                            |                         |                          |                          |                          |                           |                           |
| Previous medication                              |                          |                          |                     |                     |                       |                      |                     |                     |                            |                         |                          |                          |                          |                           |                           |
| Baseline characteristics                         |                          |                          |                     |                     |                       |                      |                     |                     |                            |                         |                          |                          |                          |                           |                           |
| Body temperature                                 |                          | X                        |                     | X                   | X                     | X                    | X                   |                     | X                          |                         |                          |                          |                          |                           | X                         |
| Signs and symptoms                               |                          | X                        |                     | X                   | X                     | X                    | X                   |                     | X                          |                         |                          |                          |                          |                           | X                         |
| Physical examination                             |                          |                          |                     |                     |                       |                      |                     |                     |                            |                         |                          |                          |                          |                           |                           |
| In/Exclusion criteria                            |                          |                          |                     |                     |                       |                      |                     |                     |                            |                         |                          |                          |                          |                           |                           |
| Blood sample for hematology/biochemistry         |                          | X                        |                     |                     | X                     |                      | X                   |                     |                            |                         |                          |                          |                          |                           |                           |
| Blood sample for PK/PD                           | X                        | X                        |                     |                     |                       |                      |                     |                     | X                          | X                       | X                        | X                        | X                        | X                         | X                         |
| Blood sample for RT-PCR and virological analyses |                          | X                        |                     |                     | X                     |                      | X                   |                     | X                          |                         |                          |                          |                          |                           |                           |
| Adverse events associated with phlebotomy        |                          | X                        |                     | X                   | X                     | X                    | X                   |                     | X                          |                         |                          |                          |                          |                           | X                         |

## Quality control and quality assurance

### Quality assurance

To ensure the quality and accuracy of the data, qualified investigators and study personnel will be selected. The protocol procedures will be reviewed with the investigators and associated personnel before the start of the study. Written instructions will be provided for collection, preparation, and shipment of blood samples. The samples will be shipped following IATA (dangerous goods regulations) for the transport of category A samples (UN2814), or category B (UN3373) or exempt specimen, with dry ice (UN1845) [32]. A designated Clinical Research Associate (CRA) will monitor study progress to facilitate compliance with GCP which requires reported data to be accurate, complete and verifiable from source documents and that the study follows the current approved protocol and applicable regulatory and laboratory requirements. The monitoring activities will be a centralized monitoring which is both onsite and remote monitoring.

In the case of onsite monitoring, source data such as eCRF, ICF and other participant data will be reviewed for accuracy and completeness and any discrepancies will be resolved with the Principal Investigator (PI) or his/her designee, as appropriate.

### Quality control of data on site

In order to ensure quality of data, several quality control (QC) measures will be put in place. Data will only be collected on validated study specific eCRFs and logs. A stringent query process will be applied for the documentation of data. Study personnel will be trained in data acquisition and documentation.

### Data management and storage

Data will be captured on study specific password-protected eCRF on tablets located in the Lassa isolation ward. The PI will be responsible for accuracy of the data. Participants data will only be linked to the unique identifier to ensure pseudonymity. The database will be made accessible only to dedicated staff from the institutions involved in the study. Biological samples and information will be stored for 10 years after the study results have been published. Direct access to source documentation (medical records) must be given to officials from ethics committees, regulatory authorities and from the sponsor for the purpose of verifying that the data recorded in the electronic database are consistent with the original source data. The research data will not be kept in the medical records of the patients. This would breach with confidentiality of

1  
2  
3  
4  
5  
6  
7  
8  
9  
10  
11  
12  
13  
14  
15  
16  
17  
18  
19  
20  
21  
22  
23  
24  
25  
26  
27  
28  
29  
30  
31  
32  
33  
34  
35  
36  
37  
38  
39  
40  
41  
42  
43  
44  
45  
46  
47  
48  
49  
50  
51  
52  
53  
54  
55  
56  
57  
58  
59  
60

BNITM

Department of Tropical Medicine



data. Only exception: If results of the study parameters (e.g. biochemical analysis) may have implication for clinical care of research participants, a copy will be provided to the responsible physician and the test result will be made available for routine care and kept in the medical records. The study identifier of this copy will be erased manually

For peer review only

BNITM

Department of Tropical Medicine



## Statistical analyses

The statistical data analyses will be performed using an appropriate software package.

## Statistical methods

PK parameters will be analysed descriptively. PK/PD analyses will be performed by employing mathematical models including potential covariates on the impact of drug exposure on viral kinetics.

## Description of classical PK parameters

A non-compartmental analysis (e.g. using Phoenix WinNonlin) will be performed to elucidate the classical PK parameters ( $C_{max}$ ,  $T_{max}$ , AUC,  $T_{1/2}$ ,  $CL$ ,  $V_d$ ).

## Population PK model

A full population PK model will be developed, with the goal to characterize the typical PK parameters of ribavirin and PK variability. Linear as well as non-linear compartmental PK models will be tested using non-linear mixed-effects modelling using NONMEM®. Once a suitable structural and variability model is built, all participant data will be used to find covariates significantly determining the interindividual variability in PK.

In particular, we will analyse the changes in ribavirin concentration and hemoglobin levels, alanine aminotransferase (ALT/GPT), and uric acid. These are prognostic markers for survival, for metabolism of ribavirin and for potential side effects and toxicity (for example hemolysis). For that purpose, a PK/tolerance model will be developed in order to relate the effect of the drugs on changes in longitudinal biological parameters as described previously for ribavirin in HCV patients [33].

## PK-pharmacodynamic modelling

The PK data will be linked to the available PD data (viral kinetics). We aim to evaluate the effect (or the lack of effect) of ribavirin monotherapy on the Lassa viral kinetics. Semi-mechanistic modelling of the effect time-courses [34] will be performed using non-linear mixed-effects modelling in NONMEM® and 'R'.

BNITM

Department of Tropical Medicine



## Protocol deviation/ violation and exclusion from analysis set

Protocol deviations will be defined as non-compliance with the protocol by the investigator team that are not considered protocol violations (e.g. missing one blood sample). Protocol violation will be defined as non-compliance to the protocol which reduces the quality or completeness of the data, makes the ICF inaccurate, or impacts a participant's safety, rights, or welfare. A protocol violation constitutes serious non-compliance and may lead to exclusion of participants from eligibility analysis and/or their discontinuation from the study.

## Handling of missing data and outliers

No imputation will be applied. Missing data will be treated as such.

## Exploitation of study results

All results, data, documents and inventions obtained, directly or indirectly, from the study, will be owned by the sponsor and the PI's department unless a law or local regulation states otherwise. The sponsor can use or exploit all results for their own use without any limitation of its industrial property (territory, area, duration) in consultation with the study centre. The full database will be the property of the sponsor and the PI's department and will be utilized for producing the final study report. The PI's department will have the right to participate with the sponsor in the publication of such results.

## Data presentation

The results of the study will be made available for the sponsor and the investigator. The sponsor and the investigator will share the responsibility for the presentations and/or publications of the results. The final decision on the publication of a manuscript/summary/presentation will be taken by the sponsor and the investigator together following an internal review with the possibility of providing comments.

The participants will be informed about any information that may affect their continued participation or their health during the course of the study. The outcome of the research will be made available to ISTH, the participants upon individual request and with the scientific community to improve future management of LF.

BNITM

Department of Tropical Medicine



## Responsibilities

### Responsibilities of the study site

The study personnel shall be responsible for performing the study in accordance with this protocol and in accordance with the legislation and international guidelines under the direction of the local PI.

They are responsible for obtaining written informed consent prior to inclusion in the study, completing the study documents and recording all relevant data in relation to the study. Each study team member shall ensure that the information reported in the document is precise and accurate. The study personnel must inform the participant on all relevant aspects of the study, including the information in the participant information sheet. All this information shall be provided to the participant in layman's terms. Participant's confidentiality is paramount.

Prior to study inclusion, the informed consent form will have to be personally completed (first name, surname), dated and signed by the participant. The person who has conveyed the information on the study to the participant shall also sign and date the informed consent form approved by the Ethics Committee.

In the case where participant is unable to read and sign the participant information sheet and informed consent form, these documents will be read and explained to the participant in the local language in the presence of a witness. The participant shall put her/his fingerprint on the informed consent form and the witness shall also sign the consent form to confirm that the participant has consented willingly. A copy of the information sheet and the signed consent form shall be handed over to the participant.

### Responsibility of the sponsor

The study sponsor's responsibility is toward the study team at the study site and the health authorities and shall take all reasonable measures to ensure the good conduct of the study with regards to ethics, protocol compliance, integrity and validity of the information recorded in the participant eCRF, as well as with regards to the availability of the adequate resources to ensure appropriate conduct of the study. The principal function of the study management team is to help the investigator and the sponsor to maintain a high level of ethical, scientific, technical and regulatory standards for all study-related aspects of ethics, regulations and administrative rules.

1 BNITM

2 Department of Tropical Medicine



3  
4 Ethical consideration

5  
6  
7 Regulations

8 The study shall be conducted in compliance with the Declaration of Helsinki adopted by the  
9 18th World Medical Association Assembly in 1964, and with its amendments as well as with  
10 the Nigerian National Code for Health Research Ethics (<http://nhrec.net/>). This study shall be  
11 conducted in accordance with the principles of the Good Clinical Practices as well as in  
12 compliance with the international and national laws and regulations in effect and in accordance  
13 with the applicable directives in Nigeria, in particular concerning the submission to the ethics  
14 committee and the protection of personal data.  
15  
16  
17  
18  
19

20  
21 Ethics Approval

22 The study has been approved by the Health Research Ethics Committee of Irrua Specialist  
23 Teaching Hospital.  
24  
25  
26

27 Patient and public involvement

28 Patients and general public were not involved in the conception and design of this study  
29 protocol. However, the concept of the study was clearly driven by the aim to close knowledge  
30 gaps and generate evidence that is currently missing during routine care of LF patients.  
31  
32  
33  
34  
35

36 Site clearance

37 Upon signature of the protocol, the PI accepts to respect the instructions and procedures  
38 described in the protocol, as well as the Good Clinical Practices and Good Laboratory Practices,  
39 to which he/she conforms.  
40  
41  
42  
43  
44  
45  
46  
47  
48  
49  
50  
51  
52  
53  
54  
55  
56  
57  
58  
59  
60

## Participant informed consent

The PI is responsible for ensuring that informed consent is obtained from each participant and obtaining the appropriate signatures and dates on the informed consent document prior to the performance of any protocol procedures. The investigator shall explain to each study participant the nature of the study, its objective, the procedures involved, its risks and potential benefits and any discomfort it may generate [26]. This investigator is independent from the standard of care treatment of research participants. The participant will sign on the informed consent sheet after having read and voluntarily agreed to it. Where the participant is unable to read, an impartial witness should be present during the entire informed consent discussion. After inclusion, the participant may elect to withdraw from the study when he/she so wishes. The same level of attention will be dispensed to that individual. The investigator shall obtain from the participant a signed (fingerprint and signature from a witness for participants unable to read and write), written consent. If informed consent is not obtained, the patient will not be enrolled. If during the course of the research project new information become available about the treatment/the disease that is being studied, the investigator will tell the participant about it and discuss with him/her whether he/she wants to continue in the research project. If the participant decides to withdraw, the investigator will make arrangements for the regular health care to continue. If the participants decide to continue in the research project, he/she will be asked to sign an updated consent form.

Also, on receiving new information, the investigator might consider it will be in the participant's best interests to withdraw him/her from the research project. If this happens, the investigator will explain the reasons and arrange for the regular health care to continue.

## Pseudonymity, confidentiality and data protection

To ensure pseudonymity of study participants, an identification number will be attributed to each participant at the time of study entry. This unique identifier will be used for the identification of study specific documentation and labelling of samples throughout the study as well as for documentation of the electronic database.

To ensure confidentiality of the information collected eCRFs and laboratory documentation will be kept in a locked room with restricted access. The electronic database will only be accessible with a password. Only designated study personnel, the sponsor and the sponsor's delegate will have access to these documents.

1  
2  
3  
4  
5  
6  
7  
8  
9  
10  
11  
12  
13  
14  
15  
16  
17  
18  
19  
20  
21  
22  
23  
24  
25  
26  
27  
28  
29  
30  
31  
32  
33  
34  
35  
36  
37  
38  
39  
40  
41  
42  
43  
44  
45  
46  
47  
48  
49  
50  
51  
52  
53  
54  
55  
56  
57  
58  
59  
60BNITM  
Department of Tropical Medicine

## Voluntariness

The participant must be informed that his/her participation is entirely voluntary, that he/she can withdraw from the study at any time and that withdrawal will not affect his/her subsequent medical treatment nor his relationship with the treating physician. If participants withdraw from the study, they will be asked whether information that has been obtained about them before they have chosen to withdraw may be used for analysis and hence may be included in reports and publications. If participants also withdraw their consent for data processing, all obtained data from them will be excluded from further analysis and processing.

## Incentives

No financial incentives will be given in return of participating to the study due to the risk of manipulation and coercion. As incentive for taking part in the study, participants will receive one long-lasting impregnated mosquito net during their last appointment (approximate value 6 US\$). Furthermore, the research participants will be provided with protein bars to balance the loss of proteins due to multiple blood drawing. In exceptional circumstances, additional material incentives such as fruit juice, candies or phone credits might be provided.

### **Contributorship statement:**

CE, SO, EO, SG, MR and MG designed the study and drafted the protocol. OE, PA, GE, TO, CW, FS, TK, SW, FK, SD, LO and MP wrote on and reviewed the study protocol and will be involved in patient care, sample processing or data analysis during the study.

### **Competing interests:**

None of the authors reported competing interest

### **Funding:**

This research is funded as part of the Global Health Protection Programme (GHPP) of the German Federal Ministry of Health, project ZMVI1-2519GHP704

### **Data sharing statement:**

Project at protocol stage. There has no data been generated yet. Data will be made available upon request.

## References

1. Frame, J.D., et al., *Lassa fever, a new virus disease of man from West Africa. I. Clinical description and pathological findings.* Am J Trop Med Hyg, 1970. **19**(4): p. 670-6.
2. Monath, T.P., et al., *Lassa virus isolation from Mastomys natalensis rodents during an epidemic in Sierra Leone.* Science, 1974. **185**(4147): p. 263-5.
3. Fisher-Hoch, S.P., et al., *Review of cases of nosocomial Lassa fever in Nigeria: the high price of poor medical practice.* BMJ, 1995. **311**(7009): p. 857-9.
4. McCormick, J.B., et al., *A case-control study of the clinical diagnosis and course of Lassa fever.* J Infect Dis, 1987. **155**(3): p. 445-55.
5. Bausch, D.G., et al., *Lassa fever in Guinea: I. Epidemiology of human disease and clinical observations.* Vector Borne Zoonotic Dis, 2001. **1**(4): p. 269-81.
6. Frame, J.D., *Clinical features of Lassa fever in Liberia.* Rev Infect Dis, 1989. **11** Suppl 4: p. S783-9.
7. McCormick, J.B., et al., *Lassa virus hepatitis: a study of fatal Lassa fever in humans.* Am J Trop Med Hyg, 1986. **35**(2): p. 401-7.
8. Johnson, K.M., et al., *Clinical virology of Lassa fever in hospitalized patients.* J Infect Dis, 1987. **155**(3): p. 456-64.
9. Cummins, D., et al., *Lassa fever encephalopathy: clinical and laboratory findings.* J Trop Med Hyg, 1992. **95**(3): p. 197-201.
10. Asogun, D.A., et al., *Molecular diagnostics for lassa fever at Irrua specialist teaching hospital, Nigeria: lessons learnt from two years of laboratory operation.* PLoS Negl Trop Dis, 2012. **6**(9): p. e1839.
11. Burki, T., *Lassa fever in Nigeria: the great unknown.* Lancet, 2018. **391**(10122): p. 728.
12. World Health Organization. *A research and development Blueprint for action to prevent epidemics.* 2018 FEB 2018 27JUL2018]; Available from: <http://www.who.int/blueprint/en/>.
13. World Health Organization. 2018 07MAY2018]; Available from: <http://www.who.int/csr/don/20-april-2018-lassa-fever-nigeria/en/>.
14. Ehichioya, D.U., et al., *Current molecular epidemiology of Lassa virus in Nigeria.* J Clin Microbiol, 2011. **49**(3): p. 1157-61.
15. Olschlager, S., et al., *Improved detection of Lassa virus by reverse transcription-PCR targeting the 5' region of S RNA.* J Clin Microbiol, 2010. **48**(6): p. 2009-13.
16. Jahrling, P.B., et al., *Lassa virus infection of rhesus monkeys: pathogenesis and treatment with ribavirin.* J Infect Dis, 1980. **141**(5): p. 580-9.
17. Jahrling, P.B., C.J. Peters, and E.L. Stephen, *Enhanced treatment of Lassa fever by immune plasma combined with ribavirin in cynomolgus monkeys.* J Infect Dis, 1984. **149**(3): p. 420-7.
18. Stephen, E.L. and P.B. Jahrling, *Experimental Lassa fever virus infection successfully treated with ribavirin.* Lancet, 1979. **1**(8110): p. 268-9.
19. Dvoretzkaia, V.I., et al., *[Comparative evaluation of the antiviral efficacy of virazole and ribamidil in experimental Lassa fever in monkeys].* Vopr Virusol, 1990. **35**(2): p. 151-2.
20. Crotty, S., C.E. Cameron, and R. Andino, *RNA virus error catastrophe: direct molecular test by using ribavirin.* Proc Natl Acad Sci U S A, 2001. **98**(12): p. 6895-900.
21. Crotty, S., et al., *The broad-spectrum antiviral ribonucleoside ribavirin is an RNA virus mutagen.* Nat Med, 2000. **6**(12): p. 1375-9.
22. McCormick, J.B., et al., *Lassa fever. Effective therapy with ribavirin.* N Engl J Med, 1986. **314**(1): p. 20-6.
23. Eberhardt, K.A., et al., *Ribavirin for the Treatment of Lassa Fever: A Systematic Review and Meta-Analysis.* Int J Infect Dis, 2019.
24. World Health Organization, *Application for inclusion of ribavirin in the WHO model list of essential medicines.* 2006.

## BNITM

Department of Tropical Medicine



25. Preston, S.L., et al., *Pharmacokinetics and absolute bioavailability of ribavirin in healthy volunteers as determined by stable-isotope methodology*. *Antimicrob Agents Chemother*, 1999. **43**(10): p. 2451-6.
26. Nigeria Centre for Disease Control, *National guidelines for Lassa Fever cases management*. 2018. p. 13.
27. Oestereich, L., et al., *Efficacy of Favipiravir Alone and in Combination With Ribavirin in a Lethal, Immunocompetent Mouse Model of Lassa Fever*. *J Infect Dis*, 2016. **213**(6): p. 934-8.
28. Jin, R., et al., *Population pharmacokinetics and pharmacodynamics of ribavirin in patients with chronic hepatitis C genotype 1 infection*. *AAPS J*, 2012. **14**(3): p. 571-80.
29. CMRC, *Maximum allowable total blood draw volumes*. 2006.
30. Nguyen, T.H., et al., *Favipiravir pharmacokinetics in Ebola-Infected patients of the JIKI trial reveals concentrations lower than targeted*. *PLoS Negl Trop Dis*, 2017. **11**(2): p. e0005389.
31. Loregian, A., et al., *Measurement of ribavirin and evaluation of its stability in human plasma by high-performance liquid chromatography with UV detection*. *J Chromatogr B Analyt Technol Biomed Life Sci*, 2007. **856**(1-2): p. 358-64.
32. World Health Organization, *Guidance on regulations for the Transport of Infectious Substances 2009-2010*. 2008.  
[https://www.who.int/csr/resources/publications/biosafety/WHO\\_HSE\\_EPR\\_2008\\_10.pdf?ua=1](https://www.who.int/csr/resources/publications/biosafety/WHO_HSE_EPR_2008_10.pdf?ua=1)
33. Laouenan, C., et al., *A Model-Based Illustrative Exploratory Approach to Optimize the Dosing of Peg-IFN/RBV in Cirrhotic Hepatitis C Patients Treated With Triple Therapy*. *CPT Pharmacometrics Syst Pharmacol*, 2015. **4**(1): p. e00008.
34. Wicha, S.G., W. Huisinga, and C. Kloft, *Translational Pharmacometric Evaluation of Typical Antibiotic Broad-Spectrum Combination Therapies Against Staphylococcus Aureus Exploiting In Vitro Information*. *CPT Pharmacometrics Syst Pharmacol*, 2017. **6**(8): p. 512-522.

# BMJ Open

## A study protocol for a prospective observational study on the pharmacokinetic properties of the Irrua ribavirin regimen used in routine clinical practice in Lassa fever patients in Nigeria

|                               |                                                                                                                                                                                                                                                                                                                                                                                                                                                                                                                                                                                                                                                                                                                                                                                                                                                                                                                                                                                                                                                                                                                                                                                                                                                                                                                                                                                                                                                                                                                                                                                                                                                                                                                                                                                                                                                                                                                                                                                                                                                                                                                                                                                                                        |
|-------------------------------|------------------------------------------------------------------------------------------------------------------------------------------------------------------------------------------------------------------------------------------------------------------------------------------------------------------------------------------------------------------------------------------------------------------------------------------------------------------------------------------------------------------------------------------------------------------------------------------------------------------------------------------------------------------------------------------------------------------------------------------------------------------------------------------------------------------------------------------------------------------------------------------------------------------------------------------------------------------------------------------------------------------------------------------------------------------------------------------------------------------------------------------------------------------------------------------------------------------------------------------------------------------------------------------------------------------------------------------------------------------------------------------------------------------------------------------------------------------------------------------------------------------------------------------------------------------------------------------------------------------------------------------------------------------------------------------------------------------------------------------------------------------------------------------------------------------------------------------------------------------------------------------------------------------------------------------------------------------------------------------------------------------------------------------------------------------------------------------------------------------------------------------------------------------------------------------------------------------------|
| Journal:                      | <i>BMJ Open</i>                                                                                                                                                                                                                                                                                                                                                                                                                                                                                                                                                                                                                                                                                                                                                                                                                                                                                                                                                                                                                                                                                                                                                                                                                                                                                                                                                                                                                                                                                                                                                                                                                                                                                                                                                                                                                                                                                                                                                                                                                                                                                                                                                                                                        |
| Manuscript ID                 | bmjopen-2020-036936.R2                                                                                                                                                                                                                                                                                                                                                                                                                                                                                                                                                                                                                                                                                                                                                                                                                                                                                                                                                                                                                                                                                                                                                                                                                                                                                                                                                                                                                                                                                                                                                                                                                                                                                                                                                                                                                                                                                                                                                                                                                                                                                                                                                                                                 |
| Article Type:                 | Protocol                                                                                                                                                                                                                                                                                                                                                                                                                                                                                                                                                                                                                                                                                                                                                                                                                                                                                                                                                                                                                                                                                                                                                                                                                                                                                                                                                                                                                                                                                                                                                                                                                                                                                                                                                                                                                                                                                                                                                                                                                                                                                                                                                                                                               |
| Date Submitted by the Author: | 16-Mar-2020                                                                                                                                                                                                                                                                                                                                                                                                                                                                                                                                                                                                                                                                                                                                                                                                                                                                                                                                                                                                                                                                                                                                                                                                                                                                                                                                                                                                                                                                                                                                                                                                                                                                                                                                                                                                                                                                                                                                                                                                                                                                                                                                                                                                            |
| Complete List of Authors:     | <p>Erameh, Cyril; Irrua Specialist Teaching Hospital, Institute of Lassa Fever Research and Control; Irrua Specialist Teaching Hospital, Department of Medicine</p> <p>Edeawe, Osahogie ; Irrua Specialist Teaching Hospital, Institute of Lassa Fever Research and Control</p> <p>Akhideno, Peter; Irrua Specialist Teaching Hospital, Institute of Lassa Fever Research and Control; Irrua Specialist Teaching Hospital, Department of Medicine</p> <p>Eifediyi , Gloria; Irrua Specialist Teaching Hospital, Institute of Lassa Fever Research and Control</p> <p>Omansen, Till; Bernhard-Nocht-Institut für Tropenmedizin, Department of Tropical Medicine &amp; I. Department of Medicine University Medical Center Hamburg-Eppendorf</p> <p>Wagner, Christine; Bernhard-Nocht-Institut für Tropenmedizin, Department of Tropical Medicine &amp; I. Department of Medicine University Medical Center Hamburg-Eppendorf</p> <p>Sarpong, Francisca; Bernhard-Nocht-Institut für Tropenmedizin, Department of Tropical Medicine &amp; I. Department of Medicine University Medical Center Hamburg-Eppendorf</p> <p>Koch, Till; Bernhard-Nocht-Institut für Tropenmedizin, Department of Tropical Medicine &amp; I. Department of Medicine University Medical Center Hamburg-Eppendorf</p> <p>Wicha, Sebastian; University of Hamburg, Department of Clinical Pharmacology</p> <p>Kurth, Florian; Bernhard-Nocht-Institut für Tropenmedizin, Department of Tropical Medicine &amp; I. Department of Medicine University Medical Center Hamburg-Eppendorf; Charité Universitätsmedizin Berlin, Department of Infectious Diseases and Pulmonary Medicine</p> <p>Duraffour, Sophie; Bernhard-Nocht-Institut für Tropenmedizin, Department of Virology</p> <p>Oestereich, Lisa; Bernhard-Nocht-Institut für Tropenmedizin, Department of Virology</p> <p>Pahlmann, Meike; Bernhard-Nocht-Institut für Tropenmedizin, Department of Virology</p> <p>Okogbenin, Sylvanus; Irrua Specialist Teaching Hospital, Department of Obstetrics and Gynaecology; Irrua Specialist Teaching Hospital, Institute of Lassa Fever Research and Control</p> <p>Ogbaini-Emovon, Ephraim; Irrua Specialist Teaching Hospital, Institute</p> |

|                                      |                                                                                                                                                                                                                                                                                                                                                                                                                                                                                           |
|--------------------------------------|-------------------------------------------------------------------------------------------------------------------------------------------------------------------------------------------------------------------------------------------------------------------------------------------------------------------------------------------------------------------------------------------------------------------------------------------------------------------------------------------|
|                                      | of Lassa Fever Research and Control<br>Günther, Stephan; Bernhard-Nocht-Institut für Tropenmedizin,<br>Department of Virology<br>Ramharter, Michael; Bernhard-Nocht-Institut für Tropenmedizin,<br>Department of Tropical Medicine & I. Department of Medicine University<br>Medical Center Hamburg-Eppendorf<br>Groger, Mirjam; Bernhard-Nocht-Institut für Tropenmedizin, Department<br>of Tropical Medicine & I. Department of Medicine University Medical<br>Center Hamburg-Eppendorf |
| <b>Primary Subject<br/>Heading</b> : | Infectious diseases                                                                                                                                                                                                                                                                                                                                                                                                                                                                       |
| Secondary Subject Heading:           | Pharmacology and therapeutics                                                                                                                                                                                                                                                                                                                                                                                                                                                             |
| Keywords:                            | INFECTIOUS DISEASES, CLINICAL PHARMACOLOGY, VIROLOGY                                                                                                                                                                                                                                                                                                                                                                                                                                      |
|                                      |                                                                                                                                                                                                                                                                                                                                                                                                                                                                                           |

SCHOLARONE™  
Manuscripts



I, the Submitting Author has the right to grant and does grant on behalf of all authors of the Work (as defined in the below author licence), an exclusive licence and/or a non-exclusive licence for contributions from authors who are: i) UK Crown employees; ii) where BMJ has agreed a CC-BY licence shall apply, and/or iii) in accordance with the terms applicable for US Federal Government officers or employees acting as part of their official duties; on a worldwide, perpetual, irrevocable, royalty-free basis to BMJ Publishing Group Ltd ("BMJ") its licensees and where the relevant Journal is co-owned by BMJ to the co-owners of the Journal, to publish the Work in this journal and any other BMJ products and to exploit all rights, as set out in our [licence](#).

The Submitting Author accepts and understands that any supply made under these terms is made by BMJ to the Submitting Author unless you are acting as an employee on behalf of your employer or a postgraduate student of an affiliated institution which is paying any applicable article publishing charge ("APC") for Open Access articles. Where the Submitting Author wishes to make the Work available on an Open Access basis (and intends to pay the relevant APC), the terms of reuse of such Open Access shall be governed by a Creative Commons licence – details of these licences and which [Creative Commons](#) licence will apply to this Work are set out in our licence referred to above.

Other than as permitted in any relevant BMJ Author's Self Archiving Policies, I confirm this Work has not been accepted for publication elsewhere, is not being considered for publication elsewhere and does not duplicate material already published. I confirm all authors consent to publication of this Work and authorise the granting of this licence.

1  
2  
3  
4  
5  
6  
7  
8  
9  
10  
11  
12  
13  
14  
15  
16  
17  
18  
19  
20  
21  
22  
23  
24  
25  
26  
27  
28  
29  
30  
31  
32  
33  
34  
35  
36  
37  
38  
39  
40  
41  
42  
43  
44  
45  
46  
47  
48  
49  
50  
51  
52  
53  
54  
55  
56  
57  
58  
59  
60

# A study protocol for a prospective observational study on the pharmacokinetic properties of the Irrua ribavirin regimen used in routine clinical practice in Lassa fever patients in Nigeria

## *Acronym: PAIRR (Pharmacologic Analysis of the Irrua Ribavirin Regimen)*

### Authors:

Cyril Erameh<sup>1,2</sup>, Osahogie Edeawe<sup>1</sup>, Peter Akhiden<sup>1,2</sup>, Gloria Eifediyi<sup>1</sup>, Till Omansen<sup>3</sup>, Christine Wagner<sup>3</sup>, Francisca Sarpong<sup>3</sup>, Till Koch<sup>3</sup>, Sebastian Wicha<sup>4</sup>, Florian Kurth<sup>3,5</sup>, Sophie Duraffour<sup>6</sup>, Lisa Oestereich<sup>6</sup>, Meike Pahlmann<sup>6</sup>, Sylvanus Okogbenin<sup>1,7</sup>, Ephraim Ogbaini-Emovon<sup>1</sup>, Stephan Günther<sup>6</sup>, Michael Ramharter<sup>3</sup>, Mirjam Groger<sup>3</sup>

1 Institute of Lassa Fever Research and Control, Irrua Specialist Teaching Hospital, Irrua, Nigeria

2 Department of Medicine, Irrua Specialist Teaching Hospital, Irrua, Nigeria

3 Department of Tropical Medicine, Bernhard Nocht Institute for Tropical Medicine & I. Department of Medicine University Medical Center Hamburg-Eppendorf, Hamburg, Germany

4 Department of Clinical Pharmacology, Institute of Pharmacology, University of Hamburg, Hamburg, Germany

5 Department of Infectious Diseases and Pulmonary Medicine, Charité Universitätsmedizin Berlin, Berlin, Germany

6 Department of Virology, Bernhard Nocht Institute for Tropical Medicine, Hamburg, Germany

7 Department of Obstetrics and Gynecology, Irrua Specialist Teaching Hospital, Irrua, Nigeria

### **Corresponding Author:**

Mirjam Groger MD, PhD

Department of Tropical Medicine

Bernhard-Nocht-Institute for Tropical Medicine &

I. Dep. of Medicine, University Medical Center Hamburg-Eppendorf

groger@bnitm.de

Version: 03 06DEC2019

## Abstract

### Introduction:

Lassa fever (LF) is a severe and often fatal systemic disease in humans and affects a large number of countries in West Africa. Treatment options are limited to supportive care and the broad-spectrum antiviral agent ribavirin. However, evidence for ribavirin efficacy in LF patients is poor and pharmacokinetic (PK) data are not available.

Irrua Specialist Teaching Hospital (ISTH), developed an intravenous ribavirin regimen different to the WHO recommendation. Apart from a lower total daily dose the drug is usually administered once per day which reduces the exposure of personnel to LF patients. The aim of this study is to characterize the PK of the Irrua Ribavirin Regimen.

### Methods and analysis:

This prospective, observational clinical study will assess PK properties of the Irrua Ribavirin Regimen on routinely ribavirin treated LF patients at ISTH, a referral hospital serving 19 local governmental areas in a LF endemic zone in Nigeria. Participants will be adults with PCR-confirmed LF. The primary objective is to describe classical PK parameters for ribavirin (maximum plasma drug concentration ( $C_{max}$ ), Time to maximum plasma drug concentration ( $T_{max}$ ), area under the plasma drug concentration versus time curve (AUC), half-life time  $T_{1/2}$ , volume of distribution ( $V_d$ )). Blood samples will be collected at 0.5, 1, 3, 5, 8, 12 and 24 hours after doses on day 1, day 4 and day 10 of ribavirin treatment. Plasma ribavirin plasma concentrations will be determined using liquid chromatography coupled to tandem mass spectrometry (LC-MS/MS).

### Ethics and dissemination

The study will be conducted in compliance with the protocol, the Declaration of Helsinki, the ICH-GCP guideline and the Nigerian National Code for Health Research Ethics. The protocol has received approval by the Health Research Ethics Committee of ISTH.

Results will be made available to LF survivors, their caregivers, the funders, LF research society and other researchers.

### Registration details

The study will be registered at ISRCTN registry before inclusion of first patient

### Summary, strengths and weaknesses of this study

- PAIRR will provide pharmacokinetic data on intravenous ribavirin treatment, the current standard treatment in patients with LF.
- The results of this study will provide the basis for future dose optimization studies with the ultimate goal of improving patient care.
- A limitation of the study is, that due to ethical reasons only patients will be included who are able to give written or oral informed consent themselves. Therefore, unconscious patients or patients with impaired consciousness will not be included, which will result in a study population not fully representative of unselected LF-patients.

## 1 List of abbreviations

|                    |                                                            |
|--------------------|------------------------------------------------------------|
| ALT                | Alanine aminotransferase                                   |
| AST                | Aspartate aminotransferase                                 |
| AUC                | Area under the plasma drug concentration versus time curve |
| BNITM              | Bernhard Nocht Institute for Tropical Medicine             |
| BUN                | Blood urea nitrogen                                        |
| C <sub>max</sub>   | Maximum plasma drug concentration                          |
| CRA                | Clinical research associate                                |
| CRF                | Case report form                                           |
| eCRF               | electronic case report form                                |
| EC                 | European Commission                                        |
| GCP                | Good Clinical Practice                                     |
| GOT                | Aspartate aminotransferase                                 |
| GPT                | Alanine aminotransferase                                   |
| ILFRC              | Institute of Lassa fever Research and Control              |
| ISTH               | Irrua Specialist Teaching Hospital                         |
| LASV               | Lassa virus                                                |
| LF                 | Lassa Fever                                                |
| PK                 | Pharmacokinetics                                           |
| PD                 | Pharmacodynamics                                           |
| PCR                | Polymerase chain reaction                                  |
| PI                 | Principal investigator                                     |
| QC                 | Quality control                                            |
| RT-PCR             | Reverse-transcription polymerase chain reaction            |
| TCID <sub>50</sub> | 50% Tissue Culture Infection Dose                          |
| T <sub>max</sub>   | Time to maximum plasma drug concentration                  |
| T <sub>1/2</sub>   | Half-life time                                             |
| V <sub>d</sub>     | Volume of distribution                                     |
| WHO                | World Health Organization                                  |

# Introduction

## Background

Lassa fever (LF) is an acute febrile illness associated with bleeding, organ failure, and shock caused by the Lassa virus (LASV) (arenavirus) [1]. The virus reservoir is the commensal rodent *Mastomys natalensis* [2]. LASV is also transmitted from human to human and may cause nosocomial outbreaks with case fatality rates of up to 60% [3].

A large number of low and middle-income countries (LMICs) of the West African region is affected by LF: Ghana, Guinea, Mali, Benin, Liberia, Sierra Leone, Togo and Nigeria. The proportion of hospital admissions due to LF may reach 15% in endemic zones [4-6]. Fatal cases are associated with high viremia, liver damage, renal failure, bleeding, encephalopathy, and a shock-like syndrome [4, 7-10]. Health systems in areas where the disease is endemic but also in developed countries are overwhelmed due to the lack of LF diagnostics, the risk of nosocomial transmission, and the limited treatment options [11].

Following the Ebola virus disease crisis, the World Health Organization (WHO) has initiated the research and development (R&D) Blueprint as a global strategy and preparedness plan to ensure that targeted R&D brings medical technologies to patients during epidemics [12]. The WHO and international experts have agreed on a list of priority diseases for urgent R&D which also includes LF. The WHO recognises that there is insufficient research for epidemic-prone diseases mainly affecting LMICs. The research needs of LMICs span from “proof of principle/preclinical studies to the implementation and regulation of clinical studies, innovative strategies for the production of health technologies, development of key enabling capacities, such as pathogenesis studies of the priority pathogens and surveillance methodologies, and regulatory science needed to enhance regulatory preparedness” [12].

In Nigeria, LF case management centres are only operational in three out of 36 states. LF outbreaks occur annually but have recently started becoming a major threat. At the beginning of 2018 Nigeria experienced the largest outbreak of LF ever with hundreds of recorded clinical cases [13].

## Lassa fever in Irrua

The Irrua Specialist Teaching Hospital in Irrua, Edo State, Nigeria (ISTH) is located in a hyperendemic area for LF [10, 14, 15]. Molecular LF diagnostics is performed on a daily basis. The laboratory has also been instrumental in the diagnosis of LF outbreaks in several other

**BNITM**

Department of Tropical Medicine



states of the country. There has been a long-lasting institutional collaboration between Bernhard Nocht Institute of tropical Medicine (BNITM) and ISTH during the past decade with high level of capacity building in laboratory and clinical research, including setting up of a training and research center. ISTH and BNITM are partners in various networks and projects, such as European and Developing Countries Clinical Trials Partnership-funded projects and the European Commission (EC)-funded European Mobile Laboratory project.

**Literature review**

The only drug with a proven therapeutic effect in humans with LF is the broad-spectrum nucleoside analogue ribavirin. Ribavirin reduces replication of LASV at concentrations between 10 µg/ml and 50 µg/ml in cell culture, and shows efficacy in LASV-infected monkeys [16-19]. Initiation of treatment within 5 days after inoculation protected all monkeys, while initiation of treatment at day 7 conferred only partial protection. In treated animals, viremia developed more slowly and peaked at lower titres than in untreated controls [16, 17]. The mode of action of ribavirin against LASV is not clear. Recently, it has been shown with other RNA viruses that ribavirin can be incorporated into the RNA strand leading to lethal mutagenesis of progeny genomes [20, 21]. It is assumed that, if the mutation rate is too high, the genetic information cannot be maintained and the virus population goes into extinction. This process is called lethal mutagenesis or error catastrophe.

Evidence for the currently recommended ribavirin treatment (30 mg/kg loading dose followed by 15 mg/kg every 6 hours for 4 days followed by 7.5 mg/kg every 8 hours for 6 days) adds up to one clinical study by McCormick et al. published in 1986 [22]. In patients with a high risk of fatal outcome (aspartate aminotransferase (AST/GOT) values  $\geq 150$  U/l), initiation of treatment within 6 days after onset of fever reduced the case fatality rate from 55% to 5% [23]. Similarly, in patients with high viremia ( $\geq 10^{3.6}$  TCID<sub>50</sub>/ml (50% Tissue Culture Infection Dose per millilitre)), treatment reduced the case fatality rate from 76% to 9%. Even if treatment was initiated at day 7 or later, the case fatality could be reduced in these groups to 26% and 47%, respectively. No major differences were seen between oral and intravenous treatment. When, however, reviewing the publication thoroughly, several deficits become apparent. Research participants had not been randomized to either control or treatment group but a historic cohort of untreated patients was taken as control group. The treatment group was further separated into several subgroups with different treatment options (oral ribavirin, intravenous ribavirin, convalescent plasma) and different time points of treatment (within 6 days after onset of

BNITM

Department of Tropical Medicine



symptoms or later). The authors yet did not describe how patients had been allocated to the different subgroups and whether allocation had happened before or after inclusion in the study. There was, furthermore, a questionable deviation from the planned research design as subgroups were merged together after the end of the study. Additionally, total participant numbers in treatment and control groups remain unclear. Still, despite these serious biases this study is taken as reference for LF treatment since more than 30 years [23]. The dose used in the 1986 study is recommended by WHO for treatment of LF [24]. However, no data exist about the rationale for this dose, the achieved ribavirin blood levels under this dose, or the efficacy and pharmacokinetics (PK) of other dosing schemes. Clinical experience and expert opinion in the endemic countries agree with the results but scientific evidence is still largely lacking behind. PK assessments of ribavirin are only available for different dosing regimens used for hepatitis C [25]. The multiple dose half-life of ribavirin is estimated to be approximately 300 hours (12,5 days), which would justify less frequent or daily dosing in principle [26].

Based on the highest case load of LF patients in any institution in Nigeria, ISTH developed a ribavirin regimen different from the WHO recommendation which is here referred to as “Irrua regimen” or “Irrua ribavirin treatment regimen” [27]. Apart from a higher loading dose and a lower total daily dose administered during the course of the Irrua regimen, the drug is usually administered once per day.

### Rationale for this project

LF is a dangerous infection with a high lethality rate. During the past years, cases of LASV infection increased markedly and more evidence on an efficacious therapy of this disease is direly needed. The standard treatment for LF patients is ribavirin, as the study by McCormick et.al demonstrated efficacy of ribavirin in reducing the fatality rate of LF; Ribavirin also increases survival in in-vivo animal models of LASV infection [28]. Ribavirin at ISTH is used at a dose that deviates from the WHO recommendation. From clinical experience during the last decade, the standard Irrua regimen of ribavirin is postulated to be efficacious. Yet it is aneasier to use and a safer alternative to the McCormick regimen, because the exposure of personnel to LF diseased patients is reduced. However, to our knowledge, the PK properties of the Irrua ribavirin regimen have never been described. It is not known if this dose reaches blood levels that would be sufficient to exert an antiviral effect in the patients. Therefore, in this prospective observational study we aim to obtain evidence on ribavirin PKs in patients who

BNITM

Department of Tropical Medicine



receive the Irrua ribavirin regimen as standard of care at ISTH. The Irrua regimen entails the following ribavirin dosages for intravenous use:

- 1) Start dose (day 1): 100 mg/kg; If this start dose is  $> 6g$  then  $2/3$  of the dose will be given straight away and the remaining  $1/3$  is administered 8 hours later. If this dose is  $< 6g$  than the entire dose will be given at once.
- 2) Days 2-5: 25mg/kg/day once daily
- 3) Days 6-10: 12.5mg/kg/day once daily

Data derived from this observational study will serve as basis for further clinical studies studying the efficacy and safety of ribavirin and provide the possibility to compare the Irrua regimen with alternative treatment candidates such as favipiravir and possible combination regimen of favipiravir and ribavirin. This will serve as basis for further dose optimization of ribavirin helping to further ameliorate the management of LF patients in the endemic regions. This work is thus an important cornerstone for the development and implementation of a treatment standard and evidence-based treatment recommendations for LF.

### Primary research question

What are the PK properties of ribavirin administered as per the Irrua ribavirin treatment regimen to LF patients?

### Study objectives

#### General objective

The aim of this study is to describe the PK properties of ribavirin when administered in routine care under the Irrua dosing regimen in patients with polymerase chain reaction (PCR) confirmed LF, to generate an evidence base for the use of the said regimen and to inform further studies regarding the efficacy of ribavirin, possibly in comparison and combination to other anti-viral agents.

#### Specific objectives

##### Primary objective:

1. Describe the classical PK parameters for ribavirin (maximum plasma drug concentration ( $C_{max}$ ), Time to maximum plasma drug concentration ( $T_{max}$ ), area

under the plasma drug concentration versus time curve (AUC), half-life time (T<sub>1/2</sub>), volume of distribution (V<sub>d</sub>) in LF patients treated with the Irrua ribavirin regimen.

Secondary objectives:

2. Examine the clinical, hematological, biochemical parameters of the patients and correlate them with ribavirin blood levels.
3. Study the kinetics of LASV loads in blood by reverse-transcription polymerase chain reaction (RT-PCR) and describe the association of drug exposure with the viral kinetics.
4. Determine LASV sequences and sequence changes during the treatment that might point towards resistant mutants or to increased error rate induced by the nucleoside analogue ribavirin

## Methods and Analysis

### Study design

A prospective, observational and descriptive clinical study will be conducted to assess the PK properties of the Irrua ribavirin regimen on routinely ribavirin treated LF patients at the Lassa fever isolation ward of ISTH that will be included following provision of written informed consent.

### Primary endpoint

PK parameters of the routine care ribavirin regimen at ISTH

### Secondary endpoints

- a. Viral kinetics in patients routinely treated with the Irrua ribavirin regimen
- b. LASV genome changes under the Irrua ribavirin regimen

### Study site

The Lassa Unit of the ISTH in Edo State is one of the three operating LF case management centers with an adjacent laboratory that conducts PCR testing [13]. It is a referral hospital serving 19 local governmental areas in an LF endemic zone and one of the few hospitals in West Africa that feature facilities for diagnosis, research, and treatment of LF. The Institute of Lassa fever Research and Control (ILFRC) at ISTH performs molecular LF diagnostics on a daily basis since 2008. A LF clinic for appropriate patient management was commissioned in 2010. Up to 2,000 suspected patients are tested each year of which 100-200 test positive for LASV. Most of them are treated at the ISTH Lassa ward. BNITM and ISTH established a

BNITM

Department of Tropical Medicine



Training and Clinical Trial Center that features laboratory facilities for Good Clinical Laboratory Practice (GCLP) conform processing of samples from clinical studies, including real-time RT-PCR for virus load monitoring, serology, and sequencing. These facilities shall be further upgraded and used for this study.

## Study population and selection criteria

### Study population

The study population consists of LF patients presented and routinely treated for LF on the Lassa isolation ward of ISTH which fit the below detailed selection criteria of the study.

### Sample size

A sample size of 20 evaluable patients as defined by sponsor is proposed. The sample size and sampling design was evaluated using stochastic clinical trial simulation and estimation (SSE) in NONMEM® (v. 7.4, ICON development solutions, Hanover, USA). In the SSE approach, population PK parameters including their intra- and interindividual variability of a published two compartment model [29] were used and 500 clinical trials with the proposed sampling design (0.5, 1, 3, 5, 8, 12 and 24 h after the first, fourth and tenth dose) were simulated using the Irrua dosing regimen. The population PK parameters were re-estimated and compared against the known values from the simulation step.

For PK the proposed sampling design will allow the determination of the structural PK parameters with low absolute relative bias (< 2.4%) and low imprecision (<17%). The design also supports adequate estimation of the PK variability components (inter-individual variability: absolute relative bias <6.8%, imprecision: <33.2%; intra-individual variability: absolute relative bias <-0.3%, imprecision: 2.5%).

To evaluate the potential link between PK and PD (pharmacodynamic) (viral kinetics) in the exploratory analysis, the model used in the SSE was extended by an assumed PD component (ribavirin stimulating a first-order decay of viral load). Daily sampling (where coinciding with the safety assessment, otherwise every other day as outlined in the study flow chart) of viral load will allow to detect even weak exposure response relations. For example, a ribavirin-induced decline in viral load with a viral elimination half-life of 480 h compared to no effect assuming high interpatient variability in PD response of 70% and a PD measurement error of

BNITM

Department of Tropical Medicine



30% will be detectable at a power of 99 % with adequate accuracy (absolute relative bias <17.3 %) and imprecision (< 33.2%).

## Selection criteria

### Inclusion criteria

- Age  $\geq$  18 years
- LF confirmed by RT-PCR
- Written informed consent
- Anticipated treatment with intravenous ribavirin

### Exclusion criteria

- Inability to give consent (e.g. unconscious patients/ cognitively impaired patients)
- Critical illness (based on investigator's clinical evaluation)
- Severe malnutrition
- Hemodialysis
- History of hemophilia / bleeding disorder
- Hematocrit <30 %
- History of hemoglobinopathies (i.e., sickle-cell anaemia or thalassemia major)
- Known intolerance to ribavirin
- Known pregnancy (as assessed during routine care through patient's history, physical and ultrasound examination and/or pregnancy test)
- Women who plan to get pregnant within the upcoming 3 months
- Patients who already received ribavirin within the last 7 days
- Concomitant administration of Didanosine and other contraindicated concomitant medication

## Enrolment

Recruitment of patients and inclusion in the study will be performed at the study centre during the consultation on Day 0 by an investigator who is not involved in the standard of care treatment of the patients. Vulnerable patients such as pregnant women and minors will be excluded from the research because they should not be exposed to the additional burden of drawing more blood than necessary. Cognitively impaired patients will be excluded because they cannot make an informed consent about the study participation. Furthermore, children and

1  
2  
3  
4  
5  
6  
7  
8  
9  
10  
11  
12  
13  
14  
15  
16  
17  
18  
19  
20  
21  
22  
23  
24  
25  
26  
27  
28  
29  
30  
31  
32  
33  
34  
35  
36  
37  
38  
39  
40  
41  
42  
43  
44  
45  
46  
47  
48  
49  
50  
51  
52  
53  
54  
55  
56  
57  
58  
59  
60

BNITM

Department of Tropical Medicine



pregnant women do not receive ribavirin intravenously but orally and are therefore not eligible for enrolment. Patients who fulfill selection criteria are eligible and will be proposed to participate. The patients will be informed in writing and orally about the study and they will have time to address possible questions to the investigator. They will have time to consider their participation in the study. Inclusion will follow the provision of voluntary written informed consent of the patient or the impartial witness in case of illiteracy.

A unique identifier (unique participant number) will be allocated and demographic baseline data including date of birth, sex, weight and height will be collected and documented in a study specific electronic case report form (eCRF). Patients then continue the routine standard care. The enrolment period corresponds to the period of hospitalization at the Lassa isolation ward but is limited to 11 days. Further details are outlined in Table 1.

### Study limitations

This is an observational study and no interference with medical treatment will take place. Therefore, also no comparison with different treatments or treatment regimens (e.g. the WHO recommended ribavirin regimen), will be performed.

The potential bias in this study include

- a. missing samples or insufficient sample volume to perform laboratory tests
- b. early withdrawal due to death, medical condition contraindicating the collection of blood or premature termination of intravenous ribavirin administration due to clinical improvement and switch to oral treatment based on physicians' discretion
- c. inclusion of non-severe LF cases, which may not be directly representative of patients with severe organ failure

### Study duration

The enrolment period corresponds to the length of the participant's stay at the study site until they are discharged but is limited to a duration of 11 days. The common duration for LF treatment is 10 days. The study itself is intended to start in January 2020 and it is supposed to end in September 2020.

During the course of a research project, new information may become available that impacts the research. If this happens, the investigator will tell the participants about it and discuss with

BNITM

Department of Tropical Medicine



them whether they want to continue in the research project. If they decide to withdraw, the investigator will make arrangements for their regular health care to continue. If they decide to continue in the study, they will be asked to sign an updated consent form.

Also, on receiving new information, the investigator might consider it to be in the participants' best interests to withdraw them from the research project. If this happens, he/ she will explain the reasons and arrange for their regular health care to continue

## Study procedures

The study procedures are applied by designated trained staff of ISTH, BNITM, University of Hamburg, and Ambrose Alli University (AAU, Ekpoma, Nigeria) within their usual work scope since this is an observational study and the research team is not involved in decisions regarding the participant's treatment. This study's personnel will receive a reasonable and adequate financial compensation for the time and risk/hazards involved in this research.

## Data acquisition

Baseline data (age, sex, medical history, concomitant medication, concomitant treatment, pregnancy status, weight, height, physical examination) will be collected on study specific eCRFs. Body temperature will be measured and signs and symptoms of LF (such as fatigue, diarrhea, nausea, vomiting, abdominal pain, bleeding, chest pain, hearing problems and decreased vision) will be assessed daily (during study visits indicated in the study flow) and documented in the eCRF.

## Blood sampling and analysis

Blood will be taken by laboratory staff of ISTH. Appropriate training in phlebotomy, with the aim to reduce the burden and risk on participants will be provided to all personnel involved prior to the commencement of the trial. A peripheral venous catheter will be inserted on days where more than two blood draws are necessary. Before each blood withdrawal the catheter will be rinsed and the first 3 ml will be discarded to ensure adequate quality of the blood. At the end of the study, leftover material (for example heparin plasma which is leftover after all biochemistry analyses have been performed), will be stored at ISTH and BNITM.

- 4 ml EDTA blood for PK and RT-PCR analyses

- 3 ml of EDTA blood for hematology analyses (and RT-PCR analyses in case of routine hematology blood draw)

- 3 ml of heparin blood for biochemistry analyses

**BNITM**

Department of Tropical Medicine



- 2 ml EDTA blood for RT-PCR analyses and serology

- 2 ml EDTA blood for PK analyses

In total approximately 160 ml blood (corresponding to approximately 11 tablespoons of blood) will be withdrawn within the scope of the study whereof 42 ml (approx. 3 tablespoons) are part of the routine practice and 117 ml (approx. 8 tablespoons) are additional withdrawals due to the study participation. This total amount of blood which will be withdrawn does not exceed the maximum allowable total blood draw volumes for clinical research studies [30].

**Bioanalysis / Ribavirin PK**

Blood samples will be collected at 0.5, 1, 3, 5, 8, 12 and 24 hours after the doses on day 1, day 4 and day 10 of ribavirin treatment. Additionally, it will be collected during screening before the first dose of ribavirin. Blood samples will be centrifuged and the plasma supernatant will be frozen at  $-80^{\circ}\text{C}$  within 2 h after blood sampling. Plasma samples will be shipped frozen to BNITM for viral heat inactivation using a validated protocol [31, 32]. The samples will then be shipped to the bioanalysis site (Dept. of Clinical Pharmacy, Institute of Pharmacy, University of Hamburg, Germany). There, ribavirin plasma concentrations will be determined using liquid chromatography coupled to tandem mass spectrometry.

**RT-PCR analysis / Virological response**

EDTA blood will be sampled at recruitment, 24 hours and then at study visits outlined in the study flow chart until the end of treatment. Blood will be processed directly to analyse viral load by qRT-PCR. Samples will be aliquoted, frozen and securely stored at ISTH until transported to BNITM at certain time points.

Assays such as the enzyme-linked immunosorbent assays (ELISA) and/or immunofluorescence assays will be used to determine LASV specific IgM and IgG, as well as further IgG sub-classification, and to monitor the development of LASV specific antibodies in blood. Viral growth, isolation of Lassa virus in cell culture, virus sequencing and unbiased metagenomic sequencing will be used to study the longitudinal impact of drug treatment (ribavirin) on Lassa virus genomes. Sequence analysis shall be done at both ISTH and BNITM.

Laboratory analyses requiring the use of a Biosafety Level 4 laboratory (virus isolation) will be performed at the BNITM. Aliquots of samples will be shipped to BNITM according to UN2814 regulations [33].

## Hematological and biochemical safety and tolerability

Blood will be sampled at baseline and then every second day until the tenth day of dosing at timepoints indicated in the study time schedule below. Full blood count and biochemistry will be performed. Biochemistry analysis will include creatinine, creatine kinase, uric acid, blood urea nitrogen (BUN), alanine aminotransferase (ALT/GPT), aspartate aminotransferase (AST/GOT), bilirubin,  $\gamma$ GT, amylase and serum electrolytes. Biochemical and hematological assays will be conducted by ISTH and AAU staff during the course of routine safety sampling.

## Participant safety

This is a non-interventional observational study with minimal study related risk for the participant. The biological risk in this study is limited to repeated draws of small amounts of venous blood. This risk encompasses local pain at the venepuncture site, the risk for the development of local haemorrhage due to the blood sampling and bleeding. However, even in haemorrhagic participants bleeding can be stopped by mechanical compression.

Insertion of IV catheters for repeat blood draws is associated with risk of local and systemic infection as in routine procedure. No further biological risks are associated with this observational study for the participants. The designated study monitor will monitor the data to ensure data reliability and patients' safety. An independent medical monitor will monitor the participants' safety data.

Before the start of the study, the personnel will receive trainings in Good Clinical Practice (GCP), research ethics, study procedures and phlebotomy. The study team will consist of personnel which is trained in supportive care of LF patients.

## Adverse events (AE) associated with phlebotomy

### General definition of AE

An AE is any untoward medical occurrence in a patient or clinical investigation subject administered a pharmaceutical product and which does not necessarily have a causal relationship with this treatment. An AE can therefore be any unfavourable and unintended sign (including an abnormal laboratory finding), symptom, or disease temporally associated with the use of a medicinal (investigational) product, whether or not related to the medicinal (investigational) product.

## Assessment of adverse events in this study

In this study only adverse events which are unfavourable and/or unintended signs, symptoms temporally associated with phlebotomy will be captured. This will be recorded in the participant case report form.

Clinical signs typical of LF will not be considered AEs unless the healthcare personnel considers these events as exceptional due to their evolution, their seriousness, or another factor related to these events.

## Severity

The investigator will assess the severity/intensity of the adverse events using the following guidelines:

- Mild: awareness of sign or symptom, but easily tolerated
- Moderate: enough discomfort to cause interference with usual activity
- Severe: incapacitating with inability to work or do usual activity
- Life-threatening

## Action taken

- Patient withdrawn from study
- Concomitant medication required
- Hospitalization required or prolonged
- Other

## Outcome

The investigator will follow-up the adverse event until resolution or until no further medically relevant information can be expected. Adverse event outcome will be classified as follows:

- Resolved
- Resolved with sequelae
- Continuing
- Death



Table 1: Time schedule of enrolment and assessments for participants

| STUDY EXAM                                       | Screening | First dose, day 1 | 0.5 hours post 1 <sup>st</sup> dose | 1 hour post 1 <sup>st</sup> dose | 3 hours post 1 <sup>st</sup> dose | 5 hours post 1 <sup>st</sup> dose | 8 hours post 1 <sup>st</sup> dose and administration of 2 <sup>nd</sup> dose of day 1 | 12 hours post 1 <sup>st</sup> dose | 24 hours post 1 <sup>st</sup> dose | Second day of dosing | Third day of dosing | Fourth day of dosing | 0.5 hours post dose day 4 | 1 hour post dose day 4 | 3 hours post dose day 4 | 5 hours post dose day 4 | 8 hours post dose day 4 |
|--------------------------------------------------|-----------|-------------------|-------------------------------------|----------------------------------|-----------------------------------|-----------------------------------|---------------------------------------------------------------------------------------|------------------------------------|------------------------------------|----------------------|---------------------|----------------------|---------------------------|------------------------|-------------------------|-------------------------|-------------------------|
| Visit-ID                                         | D0        |                   | D1_h 0.5                            | D1_h1                            | D1_h3                             | D1_h5                             | D1_h8                                                                                 | D1_h12                             | D1_h24                             |                      | D3                  |                      | D4_h0.5                   | D4_h1                  | D4_h3                   | D4_h5                   | D4_h8                   |
| Written informed consent                         | X         |                   |                                     |                                  |                                   |                                   |                                                                                       |                                    |                                    |                      |                     |                      |                           |                        |                         |                         |                         |
| Medical history                                  | X         |                   |                                     |                                  |                                   |                                   |                                                                                       |                                    |                                    |                      |                     |                      |                           |                        |                         |                         |                         |
| Previous medication                              | X         |                   |                                     |                                  |                                   |                                   |                                                                                       |                                    |                                    |                      |                     |                      |                           |                        |                         |                         |                         |
| Baseline characteristics                         | X         |                   |                                     |                                  |                                   |                                   |                                                                                       |                                    |                                    |                      |                     |                      |                           |                        |                         |                         |                         |
| Body temperature                                 | X         |                   | X                                   |                                  |                                   |                                   |                                                                                       |                                    | X                                  |                      | X                   |                      | X                         |                        |                         |                         |                         |
| Signs and symptoms                               | X         |                   | X                                   |                                  |                                   |                                   |                                                                                       |                                    | X                                  |                      | X                   |                      | X                         |                        |                         |                         |                         |
| Physical examination                             | X         | X                 |                                     |                                  |                                   |                                   |                                                                                       |                                    |                                    |                      |                     |                      |                           |                        |                         |                         |                         |
| In/Exclusion criteria                            | X         |                   |                                     |                                  |                                   |                                   |                                                                                       |                                    |                                    |                      |                     |                      |                           |                        |                         |                         |                         |
| Blood sample for hematology/biochemistry         | X         |                   |                                     |                                  |                                   |                                   |                                                                                       |                                    |                                    |                      | X                   |                      |                           |                        |                         |                         |                         |
| Blood sample for PK/PD                           | X         |                   | X                                   | X                                | X                                 | X                                 | X                                                                                     | X                                  | X                                  |                      |                     |                      | X                         | X                      | X                       | X                       | X                       |
| Blood sample for RT-PCR and virological analyses | X         |                   |                                     |                                  |                                   |                                   |                                                                                       |                                    | X                                  |                      | X                   |                      | X                         |                        |                         |                         |                         |
| Adverse events associated with phlebotomy        |           |                   | X                                   |                                  |                                   |                                   |                                                                                       |                                    | X                                  |                      | X                   |                      | X                         |                        |                         |                         |                         |

BNITM  
Department of Tropical Medicine



Table 1 (continue): Time schedule of enrolment and assessments for participants

| STUDY EXAM                                       | 12 hours post dose day 4 | 24 hours post dose day 4 | Fifth day of dosing | Sixth day of dosing | Seventh day of dosing | Eighth day of dosing | Ninth day of dosing | Tenth day of dosing | 0.5 hours post dose day 10 | 1 hour post dose day 10 | 3 hours post dose day 10 | 5 hours post dose day 10 | 8 hours post dose day 10 | 12 hours post dose day 10 | 24 hours post dose day 10 |
|--------------------------------------------------|--------------------------|--------------------------|---------------------|---------------------|-----------------------|----------------------|---------------------|---------------------|----------------------------|-------------------------|--------------------------|--------------------------|--------------------------|---------------------------|---------------------------|
| Visit-ID                                         | D4_h12                   | D4_h24                   | D5                  | D6                  | D7                    | D8                   | D9                  | D10                 | D10_h0.5                   | D10_h1                  | D10_h3                   | D10_h5                   | D10_h8                   | D10_h12                   | D10_h24                   |
| Written informed consent                         |                          |                          |                     |                     |                       |                      |                     |                     |                            |                         |                          |                          |                          |                           |                           |
| Medical history                                  |                          |                          |                     |                     |                       |                      |                     |                     |                            |                         |                          |                          |                          |                           |                           |
| Previous medication                              |                          |                          |                     |                     |                       |                      |                     |                     |                            |                         |                          |                          |                          |                           |                           |
| Baseline characteristics                         |                          |                          |                     |                     |                       |                      |                     |                     |                            |                         |                          |                          |                          |                           |                           |
| Body temperature                                 |                          | X                        |                     | X                   | X                     | X                    | X                   |                     | X                          |                         |                          |                          |                          |                           | X                         |
| Signs and symptoms                               |                          | X                        |                     | X                   | X                     | X                    | X                   |                     | X                          |                         |                          |                          |                          |                           | X                         |
| Physical examination                             |                          |                          |                     |                     |                       |                      |                     |                     |                            |                         |                          |                          |                          |                           |                           |
| In/Exclusion criteria                            |                          |                          |                     |                     |                       |                      |                     |                     |                            |                         |                          |                          |                          |                           |                           |
| Blood sample for hematology/biochemistry         |                          | X                        |                     |                     | X                     |                      | X                   |                     |                            |                         |                          |                          |                          |                           |                           |
| Blood sample for PK/PD                           | X                        | X                        |                     |                     |                       |                      |                     |                     | X                          | X                       | X                        | X                        | X                        | X                         | X                         |
| Blood sample for RT-PCR and virological analyses |                          | X                        |                     |                     | X                     |                      | X                   |                     | X                          |                         |                          |                          |                          |                           |                           |
| Adverse events associated with phlebotomy        |                          | X                        |                     | X                   | X                     | X                    | X                   |                     | X                          |                         |                          |                          |                          |                           | X                         |

## Quality control and quality assurance

### Quality assurance

To ensure the quality and accuracy of the data, qualified investigators and study personnel will be selected. The protocol procedures will be reviewed with the investigators and associated personnel before the start of the study. Written instructions will be provided for collection, preparation, and shipment of blood samples. The samples will be shipped following IATA (dangerous goods regulations) for the transport of category A samples (UN2814), or category B (UN3373) or exempt specimen, with dry ice (UN1845) [33]. A designated Clinical Research Associate (CRA) will monitor study progress to facilitate compliance with GCP which requires reported data to be accurate, complete and verifiable from source documents and that the study follows the current approved protocol and applicable regulatory and laboratory requirements. The monitoring activities will be a centralized monitoring which is both onsite and remote monitoring.

In the case of onsite monitoring, source data such as eCRF, ICF and other participant data will be reviewed for accuracy and completeness and any discrepancies will be resolved with the Principal Investigator (PI) or his/her designee, as appropriate.

### Quality control of data on site

In order to ensure quality of data, several quality control (QC) measures will be put in place. Data will only be collected on validated study specific eCRFs and logs. A stringent query process will be applied for the documentation of data. Study personnel will be trained in data acquisition and documentation.

### Data management and storage

Data will be captured on study specific password-protected eCRF on tablets located in the Lassa isolation ward. The PI will be responsible for accuracy of the data. Participants data will only be linked to the unique identifier to ensure pseudonymity. The database will be made accessible only to dedicated staff from the institutions involved in the study. Biological samples and information will be stored for 10 years after the study results have been published. Direct access to source documentation (medical records) must be given to officials from ethics committees, regulatory authorities and from the sponsor for the purpose of verifying that the data recorded in the electronic database are consistent with the original source data. The research data will not be kept in the medical records of the patients. This would breach with confidentiality of

1  
2  
3  
4  
5  
6  
7  
8  
9  
10  
11  
12  
13  
14  
15  
16  
17  
18  
19  
20  
21  
22  
23  
24  
25  
26  
27  
28  
29  
30  
31  
32  
33  
34  
35  
36  
37  
38  
39  
40  
41  
42  
43  
44  
45  
46  
47  
48  
49  
50  
51  
52  
53  
54  
55  
56  
57  
58  
59  
60

BNITM

Department of Tropical Medicine



data. Only exception: If results of the study parameters (e.g. biochemical analysis) may have implication for clinical care of research participants, a copy will be provided to the responsible physician and the test result will be made available for routine care and kept in the medical records. The study identifier of this copy will be erased manually

For peer review only

BNITM

Department of Tropical Medicine



## Statistical analyses

The statistical data analyses will be performed using an appropriate software package. Details will be specified in the statistical analysis plan.

## Statistical methods

PK parameters will be analysed descriptively. PK/PD analyses will be performed by employing mathematical models including potential covariates on the impact of drug exposure on viral kinetics.

## Description of classical PK parameters

A non-compartmental analysis (e.g. using Phoenix WinNonlin) will be performed to elucidate the classical PK parameters ( $C_{max}$ ,  $T_{max}$ , AUC,  $T_{1/2}$ , CL, ,  $V_d$ ). AUC will be calculated using the linear trapezoidal method. Impairments of renal function and reductions in glomerular filtration, as assessed during routine care, will be accounted for in PK analysis, details will be specified in the statistical analysis plan.

## Population PK model

A full population PK model will be developed, with the goal to characterize the typical PK parameters of ribavirin and PK variability. Linear as well as non-linear compartmental PK models will be tested using non-linear mixed-effects modelling using NONMEM®. Once a suitable structural and variability model is built, all participant data will be used to find covariates significantly determining the interindividual variability in PK.

In particular, we will analyse the changes in ribavirin concentration and hemoglobin levels, alanine aminotransferase (ALT/GPT), and uric acid. These are prognostic markers for survival, for metabolism of ribavirin and for potential side effects and toxicity (for example hemolysis). For that purpose, a PK/tolerance model will be developed in order to relate the effect of the drugs on changes in longitudinal biological parameters as described previously for ribavirin in HCV patients [34].

## PK-pharmacodynamic modelling

The PK data will be linked to the available PD data (viral kinetics). We aim to evaluate the effect (or the lack of effect) of ribavirin monotherapy on the Lassa viral kinetics. Semi-

## BNITM

Department of Tropical Medicine



mechanistic modelling of the effect time-courses [35] will be performed using non-linear mixed-effects modelling in NONMEM® and 'R'.

### Protocol deviation/ violation and exclusion from analysis set

Protocol deviations will be defined as non-compliance with the protocol by the investigator team that are not considered protocol violations (e.g. missing one blood sample). Protocol violation will be defined as non-compliance to the protocol which reduces the quality or completeness of the data, makes the ICF inaccurate, or impacts a participant's safety, rights, or welfare. A protocol violation constitutes serious non-compliance and may lead to exclusion of participants from eligibility analysis and/or their discontinuation from the study.

### Handling of missing data and outliers

No imputation will be applied. Missing data will be treated as such.

### Exploitation of study results

All results, data, documents and inventions obtained, directly or indirectly, from the study, will be owned by the sponsor and the PI's department unless a law or local regulation states otherwise. The sponsor can use or exploit all results for their own use without any limitation of its industrial property (territory, area, duration) in consultation with the study centre. The full database will be the property of the sponsor and the PI's department and will be utilized for producing the final study report. The PI's department will have the right to participate with the sponsor in the publication of such results.

### Data presentation

The results of the study will be made available for the sponsor and the investigator. The sponsor and the investigator will share the responsibility for the presentations and/or publications of the results. The final decision on the publication of a manuscript/summary/presentation will be taken by the sponsor and the investigator together following an internal review with the possibility of providing comments.

The participants will be informed about any information that may affect their continued participation or their health during the course of the study. The outcome of the research will be made available to ISTH, the participants upon individual request and with the scientific community to improve future management of LF.

BNITM

Department of Tropical Medicine



## Responsibilities

### Responsibilities of the study site

The study personnel shall be responsible for performing the study in accordance with this protocol and in accordance with the legislation and international guidelines under the direction of the local PI.

They are responsible for obtaining written informed consent prior to inclusion in the study, completing the study documents and recording all relevant data in relation to the study. Each study team member shall ensure that the information reported in the document is precise and accurate. The study personnel must inform the participant on all relevant aspects of the study, including the information in the participant information sheet. All this information shall be provided to the participant in layman's terms. Participant's confidentiality is paramount.

Prior to study inclusion, the informed consent form will have to be personally completed (first name, surname), dated and signed by the participant. The person who has conveyed the information on the study to the participant shall also sign and date the informed consent form approved by the Ethics Committee.

In the case where participant is unable to read and sign the participant information sheet and informed consent form, these documents will be read and explained to the participant in the local language in the presence of a witness. The participant shall put her/his fingerprint on the informed consent form and the witness shall also sign the consent form to confirm that the participant has consented willingly. A copy of the information sheet and the signed consent form shall be handed over to the participant.

### Responsibility of the sponsor

The study sponsor's responsibility is toward the study team at the study site and the health authorities and shall take all reasonable measures to ensure the good conduct of the study with regards to ethics, protocol compliance, integrity and validity of the information recorded in the participant eCRF, as well as with regards to the availability of the adequate resources to ensure appropriate conduct of the study. The principal function of the study management team is to help the investigator and the sponsor to maintain a high level of ethical, scientific, technical and regulatory standards for all study-related aspects of ethics, regulations and administrative rules.

1 BNITM

2 Department of Tropical Medicine



3  
4 Ethical consideration

5  
6  
7 Regulations

8 The study shall be conducted in compliance with the Declaration of Helsinki adopted by the  
9 18th World Medical Association Assembly in 1964, and with its amendments as well as with  
10 the Nigerian National Code for Health Research Ethics (<http://nhrec.net/>). This study shall be  
11 conducted in accordance with the principles of the Good Clinical Practices as well as in  
12 compliance with the international and national laws and regulations in effect and in accordance  
13 with the applicable directives in Nigeria, in particular concerning the submission to the ethics  
14 committee and the protection of personal data.  
15  
16  
17  
18  
19

20  
21 Ethics Approval

22 The study has been approved by the Health Research Ethics Committee of Irrua Specialist  
23 Teaching Hospital.  
24  
25

26  
27 Patient and public involvement

28 Patients and general public were not involved in the conception and design of this study  
29 protocol. However, the concept of the study was clearly driven by the aim to close knowledge  
30 gaps and generate evidence that is currently missing during routine care of LF patients.  
31  
32  
33  
34

35  
36 Site clearance

37 Upon signature of the protocol, the PI accepts to respect the instructions and procedures  
38 described in the protocol, as well as the Good Clinical Practices and Good Laboratory Practices,  
39 to which he/she conforms.  
40  
41  
42  
43  
44  
45  
46  
47  
48  
49  
50  
51  
52  
53  
54  
55  
56  
57  
58  
59  
60

BNITM

Department of Tropical Medicine



## Participant informed consent

The PI is responsible for ensuring that informed consent is obtained from each participant and obtaining the appropriate signatures and dates on the informed consent document prior to the performance of any protocol procedures. The investigator shall explain to each study participant the nature of the study, its objective, the procedures involved, its risks and potential benefits and any discomfort it may generate [27]. This investigator is independent from the standard of care treatment of research participants. The participant will sign on the informed consent sheet after having read and voluntarily agreed to it. Where the participant is unable to read, an impartial witness should be present during the entire informed consent discussion. After inclusion, the participant may elect to withdraw from the study when he/she so wishes. The same level of attention will be dispensed to that individual. The investigator shall obtain from the participant a signed (fingerprint and signature from a witness for participants unable to read and write), written consent. If informed consent is not obtained, the patient will not be enrolled. If during the course of the research project new information become available about the treatment/the disease that is being studied, the investigator will tell the participant about it and discuss with him/her whether he/she wants to continue in the research project. If the participant decides to withdraw, the investigator will make arrangements for the regular health care to continue. If the participants decide to continue in the research project, he/she will be asked to sign an updated consent form.

Also, on receiving new information, the investigator might consider it will be in the participant's best interests to withdraw him/her from the research project. If this happens, the investigator will explain the reasons and arrange for the regular health care to continue.

## Pseudonymity, confidentiality and data protection

To ensure pseudonymity of study participants, an identification number will be attributed to each participant at the time of study entry. This unique identifier will be used for the identification of study specific documentation and labelling of samples throughout the study as well as for documentation of the electronic database.

To ensure confidentiality of the information collected eCRFs and laboratory documentation will be kept in a locked room with restricted access. The electronic database will only be accessible with a password. Only designated study personnel, the sponsor and the sponsor's delegate will have access to these documents.

## Voluntariness

The participant must be informed that his/her participation is entirely voluntary, that he/she can withdraw from the study at any time and that withdrawal will not affect his/her subsequent medical treatment nor his relationship with the treating physician. If participants withdraw from the study, they will be asked whether information that has been obtained about them before they have chosen to withdraw may be used for analysis and hence may be included in reports and publications. If participants also withdraw their consent for data processing, all obtained data from them will be excluded from further analysis and processing.

## Incentives

No financial incentives will be given in return of participating to the study due to the risk of manipulation and coercion. As incentive for taking part in the study, participants will receive one long-lasting impregnated mosquito net during their last appointment (approximate value 6 US\$). Furthermore, the research participants will be provided with protein bars to balance the loss of proteins due to multiple blood drawing. In exceptional circumstances, additional material incentives such as fruit juice, candies or phone credits might be provided.

### **Contributorship statement:**

CE, SO, EO, SG, MR and MG designed the study and drafted the protocol. OE, PA, GE, TO, CW, FS, TK, SW, FK, SD, LO and MP wrote on and reviewed the study protocol and will be involved in patient care, sample processing or data analysis during the study.

### **Competing interests:**

None of the authors reported competing interest

### **Funding:**

This research is funded as part of the Global Health Protection Programme (GHPP) of the German Federal Ministry of Health, project ZMVI1-2519GHP704

### **Data sharing statement:**

Project at protocol stage. There has no data been generated yet. Data will be made available upon request.

## References

1. Frame, J.D., et al., *Lassa fever, a new virus disease of man from West Africa. I. Clinical description and pathological findings.* Am J Trop Med Hyg, 1970. **19**(4): p. 670-6.
2. Monath, T.P., et al., *Lassa virus isolation from Mastomys natalensis rodents during an epidemic in Sierra Leone.* Science, 1974. **185**(4147): p. 263-5.
3. Fisher-Hoch, S.P., et al., *Review of cases of nosocomial Lassa fever in Nigeria: the high price of poor medical practice.* BMJ, 1995. **311**(7009): p. 857-9.
4. McCormick, J.B., et al., *A case-control study of the clinical diagnosis and course of Lassa fever.* J Infect Dis, 1987. **155**(3): p. 445-55.
5. Bausch, D.G., et al., *Lassa fever in Guinea: I. Epidemiology of human disease and clinical observations.* Vector Borne Zoonotic Dis, 2001. **1**(4): p. 269-81.
6. Frame, J.D., *Clinical features of Lassa fever in Liberia.* Rev Infect Dis, 1989. **11** Suppl 4: p. S783-9.
7. McCormick, J.B., et al., *Lassa virus hepatitis: a study of fatal Lassa fever in humans.* Am J Trop Med Hyg, 1986. **35**(2): p. 401-7.
8. Johnson, K.M., et al., *Clinical virology of Lassa fever in hospitalized patients.* J Infect Dis, 1987. **155**(3): p. 456-64.
9. Cummins, D., et al., *Lassa fever encephalopathy: clinical and laboratory findings.* J Trop Med Hyg, 1992. **95**(3): p. 197-201.
10. Asogun, D.A., et al., *Molecular diagnostics for lassa fever at Irrua specialist teaching hospital, Nigeria: lessons learnt from two years of laboratory operation.* PLoS Negl Trop Dis, 2012. **6**(9): p. e1839.
11. Burki, T., *Lassa fever in Nigeria: the great unknown.* Lancet, 2018. **391**(10122): p. 728.
12. World Health Organisation. *A research and development Blueprint for action to prevent epidemics.* 2018 FEB 2018 27JUL2018]; Available from: <http://www.who.int/blueprint/en/>.
13. World Health Organisation. 2018 07MAY2018]; Available from: <http://www.who.int/csr/don/20-april-2018-lassa-fever-nigeria/en/>.
14. Ehichioya, D.U., et al., *Current molecular epidemiology of Lassa virus in Nigeria.* J Clin Microbiol, 2011. **49**(3): p. 1157-61.
15. Olschlager, S., et al., *Improved detection of Lassa virus by reverse transcription-PCR targeting the 5' region of S RNA.* J Clin Microbiol, 2010. **48**(6): p. 2009-13.
16. Jahrling, P.B., et al., *Lassa virus infection of rhesus monkeys: pathogenesis and treatment with ribavirin.* J Infect Dis, 1980. **141**(5): p. 580-9.
17. Jahrling, P.B., C.J. Peters, and E.L. Stephen, *Enhanced treatment of Lassa fever by immune plasma combined with ribavirin in cynomolgus monkeys.* J Infect Dis, 1984. **149**(3): p. 420-7.
18. Stephen, E.L. and P.B. Jahrling, *Experimental Lassa fever virus infection successfully treated with ribavirin.* Lancet, 1979. **1**(8110): p. 268-9.
19. Dvoretzkaia, V.I., et al., *[Comparative evaluation of the antiviral efficacy of virazole and ribamidil in experimental Lassa fever in monkeys].* Vopr Virusol, 1990. **35**(2): p. 151-2.
20. Crotty, S., C.E. Cameron, and R. Andino, *RNA virus error catastrophe: direct molecular test by using ribavirin.* Proc Natl Acad Sci U S A, 2001. **98**(12): p. 6895-900.
21. Crotty, S., et al., *The broad-spectrum antiviral ribonucleoside ribavirin is an RNA virus mutagen.* Nat Med, 2000. **6**(12): p. 1375-9.
22. McCormick, J.B., et al., *Lassa fever. Effective therapy with ribavirin.* N Engl J Med, 1986. **314**(1): p. 20-6.
23. Eberhardt, K.A., et al., *Ribavirin for the Treatment of Lassa Fever: A Systematic Review and Meta-Analysis.* Int J Infect Dis, 2019.
24. World Health Organisation, *Application for inclusion of ribavirin in the WHO model list of essential medicines.* 2006.

## BNITM

Department of Tropical Medicine



25. Preston, S.L., et al., *Pharmacokinetics and absolute bioavailability of ribavirin in healthy volunteers as determined by stable-isotope methodology*. *Antimicrob Agents Chemother*, 1999. **43**(10): p. 2451-6.
26. Glue, P., *The clinical pharmacology of ribavirin*. *Semin Liver Dis*, 1999. **19 Suppl 1**: p. 17-24.
27. Nigeria Centre for Disease Control, *National guidelines for Lassa Fever cases management*. 2018. p. 13.
28. Oestereich, L., et al., *Efficacy of Favipiravir Alone and in Combination With Ribavirin in a Lethal, Immunocompetent Mouse Model of Lassa Fever*. *J Infect Dis*, 2016. **213**(6): p. 934-8.
29. Jin, R., et al., *Population pharmacokinetics and pharmacodynamics of ribavirin in patients with chronic hepatitis C genotype 1 infection*. *AAPS J*, 2012. **14**(3): p. 571-80.
30. CMRC, *Maximum allowable total blood draw volumes*. 2006.
31. Nguyen, T.H., et al., *Favipiravir pharmacokinetics in Ebola-Infected patients of the JIKI trial reveals concentrations lower than targeted*. *PLoS Negl Trop Dis*, 2017. **11**(2): p. e0005389.
32. Loregian, A., et al., *Measurement of ribavirin and evaluation of its stability in human plasma by high-performance liquid chromatography with UV detection*. *J Chromatogr B Analyt Technol Biomed Life Sci*, 2007. **856**(1-2): p. 358-64.
33. World Health Organization, *Guidance on regulations for the Transport of Infectious Substances 2009-2010*. 2008.
34. Laouenan, C., et al., *A Model-Based Illustrative Exploratory Approach to Optimize the Dosing of Peg-IFN/RBV in Cirrhotic Hepatitis C Patients Treated With Triple Therapy*. *CPT Pharmacometrics Syst Pharmacol*, 2015. **4**(1): p. e00008.
35. Wicha, S.G., W. Huisinga, and C. Kloft, *Translational Pharmacometric Evaluation of Typical Antibiotic Broad-Spectrum Combination Therapies Against Staphylococcus Aureus Exploiting In Vitro Information*. *CPT Pharmacometrics Syst Pharmacol*, 2017. **6**(8): p. 512-522.
